# Supplementary material
Source: PubMed Central journal article supplement (PMC8048137)
Supplement: NIHMS1603506-supplement-Sup1.pdf [file NIHMS1603506-supplement-Sup1.pdf]

# **A REVIEW OF WATER QUALITY RESPONSES TO AIR TEMPERATURE AND PRECIPITATION CHANGES II: NUTRIENTS, ALGAL BLOOMS, SEDIMENT, PATHOGENS**

## *Online Supporting Information*

### **Glossary**

AVGWLF = ArcView Generalized Watershed Loading Function;

BGC = Terrestrial ecosystem/biogeochemical cycling model;

CARA = Consortium for Atlantic Regional Assessment

CMIP3/CMIP5 = Coupled Model Intercomparison Project Phase 3 or Phase 5 Archive;

GCM = General Circulation Model

GEV = Generalized Extreme Value;

GWLF-VSA = The Generalized Watershed Loading Functions – Variable Source Area model;

HSPF = Hydrologic Simulation Program – Fortran;

ICLUS = Integrated Climate and Land-Use Scenarios;

INCA-P = Integrated Catchment Model

LHS = Latin Hypercube Sampling and calculation of 95% confidence interval;

NARCCAP = North American Regional Climate Change Assessment Program;

PnET- PDLU = Percentage of developed land use;

RCP = Representative Concentration Pathway (2.6, 4.5, 6.0, 8.5);

SRES = Special Report on Emissions Scenarios (B1, A1B, A2, A1FI);

SWAT = Soil and Water Assessment Tool

SWAT-WB = Soil and Water Assessment Tool – Water Balance;

SPARROW = Spatially-Referenced Regression On Watershed attributes;

VIC = Variable Infiltration Capacity Model;

VSA = Variable Source Area;

WEPP-CO2 = Water Erosion Prediction Project – CO2

WEPP-WQ = Water Erosion Prediction Project - Water Quality

**Table S-1. Projected nitrogen load responses to future climate changes scenarios. Information is adapted from published scientific literature identified in this review.**

| Watershed<br>(Drainage Area)                                  | Future Period* | Water Model(s)              | Scenarios Used to Drive Water Model                                                                                                               | Projected Changes in Load (%)                           |                                                                                                                                     | Citation                       |
|---------------------------------------------------------------|----------------|-----------------------------|---------------------------------------------------------------------------------------------------------------------------------------------------|---------------------------------------------------------|-------------------------------------------------------------------------------------------------------------------------------------|--------------------------------|
|                                                               |                |                             |                                                                                                                                                   | Annual Median (Range)                                   | Seasonal Median (Range)                                                                                                             |                                |
| Sleepers River, VT<br>(0.405 km <sup>2</sup> )                | Late Century   | Empirical Regression Models | <b>Climate</b><br><i>Number: 9</i><br><i>Emissions: A1FI, B1</i><br><i>GCM: CMIP3</i>                                                             | <b>Nitrate:</b> -2%                                     | <b>Nitrate:</b><br><i>Growing: +57%</i><br><i>Dormant: -21%</i>                                                                     | Sebestyen <i>et al.</i> , 2009 |
| Susquehanna River<br>(71,236 km <sup>2</sup> )                | Late Century   |                             | <b>Climate</b><br><i>Number: 2</i><br><i>Emissions: 1% per year CO<sub>2</sub> increase</i><br><i>GCM: Hadley Center, Canadian Climate Center</i> | +65%<br>(+26% to +200%)                                 | -                                                                                                                                   | Howarth <i>et al.</i> , 2008   |
| 7 unnamed, Eastern Massachusetts<br>(12-105 km <sup>2</sup> ) | Early Century  | AVGWLF                      | <b>Climate</b><br><i>Number: 7</i><br><i>Emissions: A1B, B1, A2</i><br><i>GCM: CMIP3</i><br><br><b>Land use</b><br>PDLU extrapolation             | <b>A1B</b><br>Climate: +30%<br>Climate & Land use: +30% | <i>Winter:</i><br>+25% to +50%<br><i>Spring:</i><br>+5% to +10%<br><i>Summer:</i><br>-25% to -40%<br><i>Fall:</i><br>-50% to +200%  | Tu 2009 <sup>a/</sup>          |
|                                                               |                |                             |                                                                                                                                                   | <b>B1</b><br>Climate: +20%                              | <i>Winter:</i><br>+30% to +75%<br><i>Spring:</i><br>-10% to +30%<br><i>Summer:</i><br>-20% to -50%<br><i>Fall:</i><br>-75% to +120% |                                |
|                                                               |                |                             |                                                                                                                                                   | <b>A2</b><br>Climate: +30%                              | <i>Winter:</i><br>+0% to +80%<br><i>Spring:</i><br>+25% to +40%<br><i>Summer:</i><br>-25% to -50%<br><i>Fall:</i><br>-50% to +160%  |                                |

| Watershed (Drainage Area)                                                | Future Period* | Water Model(s) | Scenarios Used to Drive Water Model                                                                                                                                                                        | Projected Changes in Load (%)                                          |                                                                                                                                                     | Citation                                 |
|--------------------------------------------------------------------------|----------------|----------------|------------------------------------------------------------------------------------------------------------------------------------------------------------------------------------------------------------|------------------------------------------------------------------------|-----------------------------------------------------------------------------------------------------------------------------------------------------|------------------------------------------|
|                                                                          |                |                |                                                                                                                                                                                                            | Annual Median (Range)                                                  | Seasonal Median (Range)                                                                                                                             |                                          |
| WE-38 experimental watershed, Mahantango Creek, PA (73 km <sup>2</sup> ) | Mid Century    | SWAT           | <b>Climate</b><br><i>Number: 7</i><br><i>Emissions: A2</i><br><i>GCM: CMIP3</i><br><i>Downscaled: NARCAAP</i>                                                                                              | +7%<br>(0% to +19%)                                                    | Winter/spring: +17%<br>Summer/fall: -29%                                                                                                            | Wagena <i>et al.</i> , 2018              |
| Hubbard Brook Experimental Forest, NH (0.132 km <sup>2</sup> )           | Late Century   | PnET-BGC       | <b>Climate</b><br><i>Number: 3</i><br><i>Emissions: A1, B1</i><br><i>GCM: GFDL, HADCM3, and PCM</i>                                                                                                        | Increases in nitrate concentrations<br><br>Increases in nitrate export | -                                                                                                                                                   | Pourmokhtarian <i>et al.</i> , 2012      |
| Merrimack, NH/NE (12,965 km <sup>2</sup> )                               | Mid Century    | SWAT           | <b>Climate</b><br><i>Number: 6</i><br><i>Emissions: A2</i><br>(Future CO <sub>2</sub> effects on ET also simulated)<br><i>GCM: CMIP3</i><br><i>Downscaled: NARCCAP</i><br><br><b>Land use</b><br>EPA ICLUS | +18%<br>(+1% to +28%)                                                  | <i>Winter: +34% (+17% to +42%)</i><br><i>Spring: +15% (-16% to +21%)</i><br><i>Summer: +14% (+4% to +28%)</i><br><i>Fall: +6% (-4% to +30%)</i>     | Johnson <i>et al.</i> , 2015; USEPA 2013 |
| Susquehanna River, PA (71,236 km <sup>2</sup> )                          |                |                |                                                                                                                                                                                                            | +51%<br>(+34% to +65%)                                                 | <i>Winter: +102% (+85% to +141%)</i><br><i>Spring: +27% (+8% to +40%)</i><br><i>Summer: +15% (-3% to +28%)</i><br><i>Fall: +70% (+36% to +120%)</i> |                                          |
| Susquehanna River, PA (71,236 km <sup>2</sup> )                          | Mid Century    | SWAT           | <b>Climate</b><br><i>Number: 6</i><br><i>Emissions: RCP 8.5, RCP 2.6</i><br><i>GCM: CMIP5</i><br><i>Downscaled: WCRP</i>                                                                                   | +9%<br>(+4% to +14%)                                                   | -                                                                                                                                                   | Wagena & Easton 2018                     |
|                                                                          | Late Century   |                |                                                                                                                                                                                                            | +12%<br>(+5% to +20%)                                                  |                                                                                                                                                     |                                          |
| Tuckahoe Creek, MD (221 km <sup>2</sup> )                                | Late Century   | SWAT           | <b>Climate</b><br><i>Number: 5</i><br><i>Emissions: RCP 8.5</i>                                                                                                                                            | <b>Nitrate:</b><br>+66%<br>(+58% to +76%)                              | <i>Winter: increase</i><br><i>Spring: increase</i><br><i>Summer: increase</i><br><i>Fall: increase</i>                                              | Lee <i>et al.</i> , 2018                 |

| Watershed (Drainage Area)                          | Future Period* | Water Model(s) | Scenarios Used to Drive Water Model                                                                                                                                                                        | Projected Changes in Load (%)                                                |                                                                                                                                                                 | Citation                                 |
|----------------------------------------------------|----------------|----------------|------------------------------------------------------------------------------------------------------------------------------------------------------------------------------------------------------------|------------------------------------------------------------------------------|-----------------------------------------------------------------------------------------------------------------------------------------------------------------|------------------------------------------|
|                                                    |                |                |                                                                                                                                                                                                            | Annual Median (Range)                                                        | Seasonal Median (Range)                                                                                                                                         |                                          |
| Greenboro Watershed, MD, DE (290 km <sup>2</sup> ) |                |                | (Future CO <sub>2</sub> effects on ET also simulated)<br><i>GCM: CMIP5</i><br><i>Downscaled: WCRP</i>                                                                                                      | +56%<br>(+47% to 68%)                                                        | <i>Winter: increase</i><br><i>Spring: increase</i><br><i>Summer: increase</i><br><i>Fall: increase</i>                                                          |                                          |
| Neuse, NC (25,828 km <sup>2</sup> )                | Mid Century    |                | <b>Climate</b><br><i>Number: 6</i><br><i>Emissions: A2</i><br>(Future CO <sub>2</sub> effects on ET also simulated)<br><i>GCM: CMIP3</i><br><i>Downscaled: NARCCAP</i><br><br><b>Land use</b><br>EPA ICLUS | +31%<br>(-1% to +88%)                                                        | <i>Winter: +28%</i><br>(+20% to +34%)<br><i>Spring: +26%</i><br>(+11% to +31%)<br><i>Summer: +8%</i><br>(-40% to +130%)<br><i>Fall: +40%</i><br>(-22% to +193%) | Johnson <i>et al.</i> , 2015; USEPA 2013 |
| Suwannee, FL/GA (25,765 km <sup>2</sup> )          |                |                |                                                                                                                                                                                                            | +31%<br>(-15% to +66%)                                                       | <i>Winter: +39%</i><br>(-14% to +98%)<br><i>Spring: +31%</i><br>(-7% to +44%)<br><i>Summer: +27%</i><br>(-27% to +75%)<br><i>Fall: +28%</i><br>(-19% to +86%)   |                                          |
| Apalachicola, GA/FL/AL (49,943 km <sup>2</sup> )   |                |                |                                                                                                                                                                                                            | +16%<br>(-5% to +25%)                                                        | <i>Winter: +16%</i><br>(-8% to +31%)<br><i>Spring: +21%</i><br>(+7% to +30%)<br><i>Summer: +13%</i><br>(-8% to +23%)<br><i>Fall: +12%</i><br>(-14% to +26%)     |                                          |
| Amite, LA/MS (15,157 km <sup>2</sup> )             |                |                |                                                                                                                                                                                                            | +21%<br>(-12% to +51%)                                                       | <i>Winter: +9%</i><br>(-8% to +53%)<br><i>Spring: +45%</i><br>(-22% to +98%)<br><i>Summer: -16%</i><br>(-30% to +40%)<br><i>Fall: +24%</i><br>(-16% to +99%)    |                                          |
| Little Miami, OH (5,840 km <sup>2</sup> )          | Mid Century    | HSPF           | <b>Climate</b><br>(Synthetic Scenarios)<br><i>Temperature: +2°C, +4°C</i>                                                                                                                                  | <b>Wettest</b><br><i>Climate: +8%</i><br><i>Climate &amp; Land use: +12%</i> | -                                                                                                                                                               | Tong <i>et al.</i> , 2012                |

| Watershed<br>(Drainage<br>Area)                                   | Future<br>Period* | Water<br>Model(s) | Scenarios Used to<br>Drive Water Model                                                                      | Projected Changes in Load (%)                                                                |                            | Citation                     |
|-------------------------------------------------------------------|-------------------|-------------------|-------------------------------------------------------------------------------------------------------------|----------------------------------------------------------------------------------------------|----------------------------|------------------------------|
|                                                                   |                   |                   |                                                                                                             | Annual Median<br>(Range)                                                                     | Seasonal Median<br>(Range) |                              |
|                                                                   |                   |                   | <i>Precipitation: ±20%</i><br><br><b>Land use</b><br>CA-Markov Model                                        | <b>Wet</b><br><i>Climate: +5%</i><br><i>Climate &amp; Land use:</i><br>+7%                   |                            |                              |
|                                                                   |                   |                   |                                                                                                             | <b>Dry</b><br><i>Climate: +1%</i><br><i>Climate &amp; Land use:</i><br>+3%                   |                            |                              |
|                                                                   |                   |                   |                                                                                                             | <b>Driest</b><br><i>Climate: +2%</i><br><i>Climate &amp; Land use:</i><br>+4%                |                            |                              |
| Little River,<br>NC<br>(203 km <sup>2</sup> )                     | Late<br>Century   | SWAT              | <b>Climate</b><br><i>Number: 2</i><br><i>Emissions: A2</i><br><i>GCM: CMIP3</i><br><b>Land use</b><br>ICLUS | <b>Nitrate:</b><br>+30% (approx.)                                                            | -                          | Gabriel <i>et al.</i> , 2018 |
| Nahunta, NC<br>(207 km <sup>2</sup> )                             |                   |                   |                                                                                                             |                                                                                              |                            |                              |
| Upper<br>Mississippi<br>River Basin<br>(492,000 km <sup>2</sup> ) | Mid<br>Century    | SWAT<br>SPARROW   | <b>Climate</b><br><i>Number: 10</i><br><i>Emissions: A1B</i><br><i>GCM: CMIP3</i>                           | <b>Nitrate:</b><br>+1 kg/ha basin average<br>(-3 kg/ha to +8 kg/ha<br>across sub watersheds) | -                          | Jha <i>et al.</i> ,<br>2015  |
| Saginaw Bay<br>(4 watersheds),<br>MI<br>(22,533 km <sup>2</sup> ) | Late<br>Century   | SWAT              | <b>Climate</b><br>Synthetic Scenarios<br><i>Number: 16</i><br><i>Emissions: A2</i><br><i>GCM: CMIP3</i>     | Dry-Dry:<br>-34% to +4%                                                                      | -                          | Hall <i>et al.</i> , 2017    |
|                                                                   |                   |                   |                                                                                                             | Wet-Dry:<br>-5% to +29%                                                                      |                            |                              |
|                                                                   |                   |                   |                                                                                                             | Wet-Wet:<br>+13% to +41%                                                                     |                            |                              |

| Watershed (Drainage Area)                    | Future Period* | Water Model(s) | Scenarios Used to Drive Water Model                                                                                                                                                                        | Projected Changes in Load (%)                          |                                                                                                                                                                  | Citation                                  |
|----------------------------------------------|----------------|----------------|------------------------------------------------------------------------------------------------------------------------------------------------------------------------------------------------------------|--------------------------------------------------------|------------------------------------------------------------------------------------------------------------------------------------------------------------------|-------------------------------------------|
|                                              |                |                |                                                                                                                                                                                                            | Annual Median (Range)                                  | Seasonal Median (Range)                                                                                                                                          |                                           |
| Maumee, OH/MI/IL (17,207 km <sup>2</sup> )   | Mid Century    | SWAT           | <b>Climate</b><br><i>Number: 6</i><br><i>Emissions: A2</i><br>(Future CO <sub>2</sub> effects on ET also simulated)<br><i>GCM: CMIP3</i><br><i>Downscaled: NARCCAP</i><br><br><b>Land use</b><br>EPA ICLUS | +43%<br>(-6% to +91%)                                  | <i>Winter: +82%</i><br>(+32% to +125%)<br><i>Spring: +17%</i><br>(-12% to +79%)<br><i>Summer: +4%</i><br>(-58% to +42%)<br><i>Fall: +69%</i><br>(-5% to +174%)   | Johnson <i>et al.</i> , 2015; USEPA, 2013 |
| Illinois, IL/WI/IN (44,040 km <sup>2</sup> ) |                |                |                                                                                                                                                                                                            | +7%<br>(-7% to +18%)                                   | <i>Winter: +9%</i><br>(-2% to +18%)<br><i>Spring: +2%</i><br>(-4% to +9%)<br><i>Summer: +4%</i><br>(-13% to +22%)<br><i>Fall: +16%</i><br>(-10% to +38%)         |                                           |
| Minnesota, MN (44,002 km <sup>2</sup> )      |                |                |                                                                                                                                                                                                            | +44%<br>(+5% to +71%)                                  | <i>Winter: +158%</i><br>(+95% to +249%)<br><i>Spring: +26%</i><br>(-7% to +42%)<br><i>Summer: +35%</i><br>(-46% to +87%)<br><i>Fall: +71%</i><br>(-15% to +160%) |                                           |
| Maumee, OH/MI/IL (17,207 km <sup>2</sup> )   | Mid Century    | SWAT           | <b>Climate:</b><br><i>Number: 3</i><br><i>Emissions: A1B</i><br><i>GCM: CMIP3</i><br><i>Downscaled: WCRP</i>                                                                                               | Nitrate: -10%                                          | Nov. to Apr.: Increase<br>May to Oct.: Decrease                                                                                                                  | Verma <i>et al.</i> , 2015                |
|                                              | Late Century   |                |                                                                                                                                                                                                            | Nitrate: +7%                                           | Oct. to Apr.: Increase<br>May to Sep.: Decrease                                                                                                                  |                                           |
| Green Lake, WI (1 km <sup>2</sup> )          | Early Century  | WEPP-WQ        | <b>Climate</b><br><i>Number: 2</i><br><i>Emissions: A2, A1B, B1</i><br><i>GCM: CMIP3</i>                                                                                                                   | <b>A2: +5%</b><br><b>A1B: +4%</b><br><b>B1: +5%</b>    | <i>Winter: increase</i><br><i>Spring: increase</i><br><i>Summer: decrease</i><br><i>Fall: increase</i>                                                           | Wang <i>et al.</i> , 2018                 |
|                                              | Mid Century    |                |                                                                                                                                                                                                            | <b>A2: +27%</b><br><b>A1B: +38%</b><br><b>B1: +30%</b> |                                                                                                                                                                  |                                           |

| Watershed<br>(Drainage Area)                                                       | Future Period* | Water Model(s) | Scenarios Used to Drive Water Model                                       | Projected Changes in Load (%)           |                                                                            | Citation                      |
|------------------------------------------------------------------------------------|----------------|----------------|---------------------------------------------------------------------------|-----------------------------------------|----------------------------------------------------------------------------|-------------------------------|
|                                                                                    |                |                |                                                                           | Annual Median (Range)                   | Seasonal Median (Range)                                                    |                               |
|                                                                                    | Late Century   |                |                                                                           | A2: +18%<br>A1B: +1%<br>B1: +28%        |                                                                            |                               |
| Walworth Watershed, WI (1 km <sup>2</sup> )                                        | Early Century  |                |                                                                           | A2: +41%<br>A1B: +96%<br>B1: +71%       | Winter: increase<br>Spring: increase<br>Summer: decrease<br>Fall: increase |                               |
|                                                                                    | Mid Century    |                |                                                                           | A2: +12%<br>A1B: +45%<br>B1: +8%        |                                                                            |                               |
|                                                                                    | Late Century   |                |                                                                           | A2: +41%<br>A1B: +53%<br>B1: +68%       |                                                                            |                               |
| Assiniboine River, Lake Winnipeg Watershed, Saskatchewan (13,500 km <sup>2</sup> ) | Mid Century    | SWAT           | Climate Number: 3<br>Emissions: A2<br>GCM: CMIP3<br>Downscaled: GCDC/NARR | +33%<br>(+10% to +50%)                  | -                                                                          | Shrestha <i>et al.</i> , 2012 |
| James River, ND/SD (53,490 km <sup>2</sup> )                                       | Mid Century    | SWAT           | Climate Number: 6<br>Emissions: B1, A1B, A2<br>GCM: CMIP3                 | B1<br>Nitrate load: -49%<br>conc.: +55% | -                                                                          | Wu <i>et al.</i> , 2012       |
|                                                                                    |                |                |                                                                           | A1B<br>Nitrate load: -54%               |                                                                            |                               |
|                                                                                    |                |                |                                                                           | A2<br>Nitrate load: -55%<br>conc.: +70% |                                                                            |                               |

| Watershed<br>(Drainage Area)                    | Future Period* | Water Model(s) | Scenarios Used to Drive Water Model                                                                                                                                                                        | Projected Changes in Load (%) |                                                                                                                                                                     | Citation                                  |
|-------------------------------------------------|----------------|----------------|------------------------------------------------------------------------------------------------------------------------------------------------------------------------------------------------------------|-------------------------------|---------------------------------------------------------------------------------------------------------------------------------------------------------------------|-------------------------------------------|
|                                                 |                |                |                                                                                                                                                                                                            | Annual Median (Range)         | Seasonal Median (Range)                                                                                                                                             |                                           |
| Tongue, MT/WY<br>(14,004 km <sup>2</sup> )      | Mid Century    | SWAT           | <b>Climate</b><br><i>Number: 6</i><br><i>Emissions: A2</i><br>(Future CO <sub>2</sub> effects on ET also simulated)<br><i>GCM: CMIP3</i><br><i>Downscaled: NARCAAP</i><br><br><b>Land use</b><br>EPA ICLUS | +28%<br>(-29% to +220%)       | <i>Winter: +157%</i><br>(+115% to +408%)<br><i>Spring: +33%</i><br>(-1% to +183%)<br><i>Summer: +21%</i><br>(-49% to +213%)<br><i>Fall: +45%</i><br>(-56% to +537%) | Johnson <i>et al.</i> , 2015; USEPA, 2013 |
| Elkhorn, NE<br>(18,133 km <sup>2</sup> )        |                |                |                                                                                                                                                                                                            | +1%<br>(-12% to +45%)         | <i>Winter: +14%</i><br>(+9% to +110%)<br><i>Spring: +2%</i><br>(-16% to +34%)<br><i>Summer: -10%</i><br>(-52% to +9%)<br><i>Fall: +25%</i><br>(-15% to +126%)       |                                           |
| Trinity, TX<br>(46,488 km <sup>2</sup> )        |                |                |                                                                                                                                                                                                            | +30%<br>(-20% to +65%)        | <i>Winter: +33%</i><br>(-19% to +46%)<br><i>Spring: +31%</i><br>(-15% to +96%)<br><i>Summer: +5%</i><br>(-12% to +134%)<br><i>Fall: +19%</i><br>(-41% to +91%)      |                                           |
| South Platte, CO<br>(37,991 km <sup>2</sup> )   | Mid Century    | SWAT           | <b>Climate</b><br><i>Number: 6</i><br><i>Emissions: A2</i><br>(Future CO <sub>2</sub> effects on ET also simulated)<br><i>GCM: CMIP3</i><br><i>Downscaled: NARCAAP</i><br><br><b>Land use</b><br>EPA ICLUS | -12%<br>(-38% to +16%)        | <i>Winter: +3%</i><br>(-6% to +23%)<br><i>Spring: +12%</i><br>(-9% to +59%)<br><i>Summer: -32%</i><br>(-64% to -6%)<br><i>Fall: -15%</i><br>(-36% to +20%)          | Johnson <i>et al.</i> , 2015; USEPA, 2013 |
| Upper Colorado, CO<br>(46,271 km <sup>2</sup> ) |                |                |                                                                                                                                                                                                            | -20%<br>(-27% to +10%)        | <i>Winter: -25%</i><br>(-34% to +11%)<br><i>Spring: +14%</i><br>(+11% to +34%)<br><i>Summer: -36%</i><br>(-40% to -3%)<br><i>Fall: -29%</i><br>(-41% to +15%)       |                                           |



| Watershed<br>(Drainage Area)                   | Future Period* | Water Model(s) | Scenarios Used to Drive Water Model                                                     | Projected Changes in Load (%) |                                                                                                                                                               | Citation                     |
|------------------------------------------------|----------------|----------------|-----------------------------------------------------------------------------------------|-------------------------------|---------------------------------------------------------------------------------------------------------------------------------------------------------------|------------------------------|
|                                                |                |                |                                                                                         | Annual Median (Range)         | Seasonal Median (Range)                                                                                                                                       |                              |
| Rio Grande, CO/NM (49,104 km <sup>2</sup> )    |                |                |                                                                                         | -52%<br>(-63% to +26%)        | <i>Winter:</i> -26%<br>(-38% to +19%)<br><i>Spring:</i> -66%<br>(-81% to +36%)<br><i>Summer:</i> -44%<br>(-61% to +15%)<br><i>Fall:</i> -27%<br>(-32% to +2%) |                              |
| Salt, AZ (15,025 km <sup>2</sup> )             |                |                |                                                                                         | -10%<br>(-16% to +42%)        | <i>Winter:</i> -6%<br>(-31% to +15%)<br><i>Spring:</i> -2%<br>(-27% to +6%)<br><i>Summer:</i> +1%<br>(-22% to +54%)<br><i>Fall:</i> -10%<br>(-38% to +130%)   |                              |
| Los Angeles, CA (2,172 km <sup>2</sup> )       |                |                |                                                                                         | 0%<br>(-10% to +39%)          | <i>Winter:</i> +6%<br>(-3% to +57%)<br><i>Spring:</i> -9%<br>(-29% to +64%)<br><i>Summer:</i> 0%<br>(-1% to +27%)<br><i>Fall:</i> -1%<br>(-6% to +11%)        |                              |
| Sacramento, CA (21,537 km <sup>2</sup> )       |                |                |                                                                                         | -1%<br>(-12% to +9%)          | <i>Winter:</i> -16%<br>(-23% to -8%)<br><i>Spring:</i> +11%<br>(0% to +19%)<br><i>Summer:</i> -7%<br>(-19% to +26%)<br><i>Fall:</i> +14%<br>(-1% to +33%)     |                              |
| Sacramento River, CA (23,300 km <sup>2</sup> ) | Late Century   | SWAT & LHS     | <b>Climate</b><br>(Synthetic Scenarios)<br><i>Temp.:</i> +6.4°C<br><i>Precip.:</i> ±20% | <b>95%CI:</b><br>-13% to +13% | <b>95%CI:</b><br><i>Winter:</i><br>-21% to +32%<br><i>Spring:</i><br>-16% to +16%<br><i>Summer:</i><br>-43% to +13%<br><i>Fall:</i><br>-12% to +16%           | Ficklin <i>et al.</i> , 2013 |

| Watershed<br>(Drainage Area)                                        | Future Period* | Water Model(s) | Scenarios Used to Drive Water Model                                                                                                                              | Projected Changes in Load (%) |                                                                                                                 | Citation                          |
|---------------------------------------------------------------------|----------------|----------------|------------------------------------------------------------------------------------------------------------------------------------------------------------------|-------------------------------|-----------------------------------------------------------------------------------------------------------------|-----------------------------------|
|                                                                     |                |                |                                                                                                                                                                  | Annual Median (Range)         | Seasonal Median (Range)                                                                                         |                                   |
| San Joaquin River, CA (14,983 km <sup>2</sup> )                     |                |                |                                                                                                                                                                  | 95%CI:<br>-26% to +28%        | 95%CI:<br>Winter: -34% to +37%<br>Spring: -42% to +26%<br>Summer: -35% to +61%<br>Fall: -16 to +71%             |                                   |
| Sycamore Creek, AZ (505 km <sup>2</sup> )                           | Early Century  | SWAT           | Climate<br>Number: 1<br>Emissions: B2<br>GCM: CMIP3<br>CGCM2<br>Downscaled: SDSM                                                                                 | -33%                          | Greatest decreases in late autumn and early spring                                                              | Ye and Grim, 2013 <sup>/c</sup>   |
|                                                                     | Mid Century    |                |                                                                                                                                                                  | -50%                          |                                                                                                                 |                                   |
|                                                                     | Late Century   |                |                                                                                                                                                                  | -60%                          |                                                                                                                 |                                   |
| Northern San Joaquin Valley watershed, CA (14,976 km <sup>2</sup> ) | Late Century   | SWAT           | Climate<br>(Synthetic Scenarios)<br>Temp.: +1.1°C to +6.4°C<br>Precip.: 0%, ±10%, ±20%                                                                           | -37% to +40%                  | -                                                                                                               | Ficklin et al., 2010              |
|                                                                     |                |                | CO <sub>2</sub> : 970 ppm                                                                                                                                        | +4 % to +37%                  |                                                                                                                 |                                   |
| Willamette River, OR (29,031 km <sup>2</sup> )                      | Mid Century    | SWAT           | Climate<br>Number: 6<br>Emissions: A2<br>(Future CO <sub>2</sub> effects on ET also simulated)<br>GCM: CMIP3<br>Downscaled: NARCCAP<br><br>Land use<br>EPA ICLUS | -4%<br>(-11% to +4%)          | Winter: -1% (-8% to +8%)<br>Spring: -10% (-19% to +4%)<br>Summer: -7% (-13% to +9%)<br>Fall: +8% (-14% to +11%) | Johnson et al., 2015; USEPA, 2013 |

\*Early Century: 2020–2040, Mid-Century: 2041–2070, and Late Century: 2071–2100.

a/ Approximate values from graph are presented

b/ Study assessed nutrient concentrations

c/ Study assessment: average daily export (kg) per day

**Table S-2. Projected phosphorus load responses to future climate changes scenarios. Information is adapted from published scientific literature identified in this review.**

| Watershed<br>(Drainage Area)                                                            | Future<br>Period* | Water<br>Model(s) | Scenarios Used to<br>Drive Water<br>Model                                                                                                                                       | Projected Changes in Load (%) |                                                                                                                                                                       | Citation                                     |
|-----------------------------------------------------------------------------------------|-------------------|-------------------|---------------------------------------------------------------------------------------------------------------------------------------------------------------------------------|-------------------------------|-----------------------------------------------------------------------------------------------------------------------------------------------------------------------|----------------------------------------------|
|                                                                                         |                   |                   |                                                                                                                                                                                 | Annual Median<br>(Range)      | Seasonal<br>Median<br>(Range)                                                                                                                                         |                                              |
| Merrimack, NH<br>(12,965 km <sup>2</sup> )                                              | Mid<br>Century    | SWAT              | <b>Climate</b><br><i>Number: 6</i><br><i>Emissions: A2</i><br>(Future CO <sub>2</sub><br>effects on ET also<br>simulated)<br><i>GCM: CMIP3</i><br><i>Downscaled:</i><br>NARCCAP | +11%<br>(-6% to +18%)         | <i>Winter: +24%</i><br>(+3% to +28%)<br><i>Spring: 0%</i><br>(-27% to +8%)<br><i>Summer: +10%</i><br>(+0% to +23%)<br><i>Fall: +10%</i><br>(-3% to +29%)              | Johnson <i>et al.</i> , 2015;<br>USEPA, 2013 |
| Susquehanna<br>River, PA<br>(71,236 km <sup>2</sup> )                                   |                   |                   |                                                                                                                                                                                 | +15%<br>(+6% to +28%)         | <i>Winter: +30%</i><br>(+22% to +40%)<br><i>Spring: +16%</i><br>(-8% to +30%)<br><i>Summer: +11%</i><br>(-7% to +26%)<br><i>Fall: +11%</i><br>(+3% to +28%)           |                                              |
| WE-38<br>experimental<br>watershed,<br>Mahantango<br>Creek, PA<br>(73 km <sup>2</sup> ) | Mid<br>Century    | SWAT              | <b>Climate</b><br><br><i>Number: 7</i><br><i>Emissions: A2</i><br><i>GCM: CMIP3</i><br><i>Downscaled:</i><br>NARCAAP                                                            | +1%<br>(0% to +43%)           | <i>Winter/spring:</i><br>+17%<br><i>Summer/fall: -</i><br>29%                                                                                                         | Wagena <i>et al.</i> , 2018                  |
| Susquehanna<br>River, PA<br>(71,236 km <sup>2</sup> )                                   | Mid<br>Century    | SWAT              | <b>Climate</b><br><br><i>Number: 6</i><br><i>Emissions: RCP</i><br>8.5, RCP 2.6<br><i>GCM: CMIP5</i><br><i>Downscaled:</i><br>WCRP                                              | -5%<br>(-15% to +5%)          | -                                                                                                                                                                     | Wagena &<br>Easton, 2018                     |
|                                                                                         | Late<br>Century   |                   |                                                                                                                                                                                 | -2%<br>(-11% to +7%)          |                                                                                                                                                                       |                                              |
| Neuse, NC<br>(25,828 km <sup>2</sup> )                                                  | Mid<br>Century    | SWAT              | <b>Climate</b><br><i>Number: 6</i><br><i>Emissions: A2</i><br>(Future CO <sub>2</sub><br>effects on ET also<br>simulated)<br><i>GCM: CMIP3</i><br><i>Downscaled:</i><br>NARCCAP | +43%<br>(-6% to +129%)        | <i>Winter: +32%</i><br>(+24% to +47%)<br><i>Spring: +30%</i><br>(+11% to +39%)<br><i>Summer: +7%</i><br>(-48% to<br>+172%)<br><i>Fall: +46%</i><br>(-28% to<br>+262%) | Johnson <i>et al.</i> , 2015;<br>USEPA, 2013 |
| Suwannee,<br>FL/GA<br>(25,765 km <sup>2</sup> )                                         |                   |                   |                                                                                                                                                                                 | +25%<br>(-24% to +73%)        | <i>Winter: +44%</i><br>(-26% to<br>+142%)                                                                                                                             |                                              |

| Watershed<br>(Drainage Area)                                   | Future<br>Period* | Water<br>Model(s) | Scenarios Used to<br>Drive Water<br>Model                                                                                                                    | Projected Changes in Load (%)                                                      |                                                                                                                                                                   | Citation                                     |
|----------------------------------------------------------------|-------------------|-------------------|--------------------------------------------------------------------------------------------------------------------------------------------------------------|------------------------------------------------------------------------------------|-------------------------------------------------------------------------------------------------------------------------------------------------------------------|----------------------------------------------|
|                                                                |                   |                   |                                                                                                                                                              | Annual Median<br>(Range)                                                           | Seasonal<br>Median<br>(Range)                                                                                                                                     |                                              |
|                                                                |                   |                   |                                                                                                                                                              |                                                                                    | <i>Spring</i> : +27%<br>(-22% to +49%)<br><i>Summer</i> : +14%<br>(-35% to +93%)<br><i>Fall</i> : +18%<br>(-40% to<br>+115%)                                      |                                              |
| Apalachicola,<br>GA/FL/AL<br>(49,943 km <sup>2</sup> )         |                   |                   |                                                                                                                                                              | +36%<br>(+6% to +51%)                                                              | <i>Winter</i> : +37%<br>(-8% to +71%)<br><i>Spring</i> : +42%<br>(+24% to +56%)<br><i>Summer</i> : +29%<br>(-7% to +45%)<br><i>Fall</i> : +29%<br>(-14% to +63%)  |                                              |
| Amite, LA/MS<br>(15,157 km <sup>2</sup> )                      |                   |                   |                                                                                                                                                              | +15%<br>(-12% to +42%)                                                             | <i>Winter</i> : +5%<br>(-11% to +51%)<br><i>Spring</i> : +37%<br>(-21% to +83%)<br><i>Summer</i> : -16%<br>(-31% to +30%)<br><i>Fall</i> : +17%<br>(-17% to +82%) |                                              |
| Little Miami,<br>OH<br>(5,840 km <sup>2</sup> )                | Mid<br>Century    | HSPF              | <b>Climate</b><br>(Synthetic<br>Scenarios)<br><i>Temperature</i> :<br>+2°C, +4°C<br><i>Precipitation</i> :<br>±20%<br><br><b>Land use</b><br>CA-Markov Model | <b>Wettest</b><br><i>Climate</i> : +14%<br><i>Climate &amp; Land use</i> :<br>+21% | -                                                                                                                                                                 | Tong <i>et al.</i> ,<br>2012 <sup>b/</sup>   |
|                                                                |                   |                   |                                                                                                                                                              | <b>Wet</b><br><i>Climate</i> : +6%<br><i>Climate &amp; Land use</i> :<br>+8%       |                                                                                                                                                                   |                                              |
|                                                                |                   |                   |                                                                                                                                                              | <b>Dry</b><br><i>Climate</i> : +8%<br><i>Climate &amp; Land use</i> :<br>+12%      |                                                                                                                                                                   |                                              |
|                                                                |                   |                   |                                                                                                                                                              | <b>Driest</b><br><i>Climate</i> : +3%<br><i>Climate &amp; Land use</i> :<br>+7%    |                                                                                                                                                                   |                                              |
| Black River<br>Watershed,<br>Ontario<br>(322 km <sup>2</sup> ) | Mid<br>Century    | INCA-P            | <b>Climate</b><br><i>Number</i> : 7<br>GCM: CGCM3<br>Downscaled:<br>SDSM4.2<br><i>Emissions</i> : A1B,<br>A2                                                 | <b>A1B</b> : +22%<br><b>A2</b> : +19%                                              | <b>A1B</b><br><i>Summer</i> : +25%<br><i>Winter</i> : +25%<br><b>A2</b><br><i>Summer</i> : +15%<br><i>Winter</i> : +40%                                           | Cross-man <i>et al.</i> , 2013 <sup>b/</sup> |
|                                                                | Late<br>Century   |                   |                                                                                                                                                              | <b>A1B</b> : +32%<br><b>A2</b> : +33%                                              | <b>A1B</b><br><i>Summer</i> : +25%<br><i>Winter</i> : +35%<br><b>A2</b><br><i>Summer</i> : +25%                                                                   |                                              |

| Watershed<br>(Drainage Area)                                   | Future<br>Period* | Water<br>Model(s) | Scenarios Used to<br>Drive Water<br>Model                                                                                                                                                                           | Projected Changes in Load (%)                                                           |                                                                                                                                                                            | Citation                                     |
|----------------------------------------------------------------|-------------------|-------------------|---------------------------------------------------------------------------------------------------------------------------------------------------------------------------------------------------------------------|-----------------------------------------------------------------------------------------|----------------------------------------------------------------------------------------------------------------------------------------------------------------------------|----------------------------------------------|
|                                                                |                   |                   |                                                                                                                                                                                                                     | Annual Median<br>(Range)                                                                | Seasonal<br>Median<br>(Range)                                                                                                                                              |                                              |
|                                                                |                   |                   |                                                                                                                                                                                                                     |                                                                                         | Winter: +40%                                                                                                                                                               |                                              |
| Maumee,<br>OH/MI/IL<br>(17,207 km <sup>2</sup> )               | Mid<br>Century    | SWAT              | <b>Climate</b><br><i>Number: 6</i><br><i>Emissions: A2</i><br>(Future CO <sub>2</sub><br>effects on ET also<br>simulated)<br><i>GCM: CMIP3</i><br><i>Downscaled:</i><br>NARCCAP<br><br><b>Land use</b><br>EPA ICLUS | +25%<br>(-12% to +50%)                                                                  | <i>Winter: +23%</i><br>(+1% to +38%)<br><i>Spring: +9%</i><br>(-13% to +54%)<br><i>Summer: +21%</i><br>(-53% to +91%)<br><i>Fall: +80%</i><br>(+29% to<br>+136%)           | Johnson <i>et al.</i> , 2015;<br>USEPA, 2013 |
| Illinois,<br>IL/WI/IN<br>(44,040 km <sup>2</sup> )             |                   |                   |                                                                                                                                                                                                                     | +8%<br>(-1% to +13%)                                                                    | <i>Winter: +14%</i><br>(+4% to +19%)<br><i>Spring: +9%</i><br>(+7% to +19%)<br><i>Summer: -1%</i><br>(-14% to +12%)<br><i>Fall: +9%</i><br>(-5% to +29%)                   |                                              |
| Minnesota, MN<br>(44,002 km <sup>2</sup> )                     |                   |                   |                                                                                                                                                                                                                     | +26%<br>(-3% to +60%)                                                                   | <i>Winter: +108%</i><br>(+82% to<br>+167%)<br><i>Spring: -6%</i><br>(-31% to +20%)<br><i>Summer: +49%</i><br>(-50% to<br>+138%)<br><i>Fall: +38%</i><br>(-44% to<br>+163%) |                                              |
| Saginaw Bay (4<br>watersheds), MI<br>(22,533 km <sup>2</sup> ) | Late<br>Century   | SWAT              | <b>Climate</b><br>Synthetic Scenarios<br><i>Number: 16</i><br><i>Emissions: A2</i><br><i>GCM: CMIP3</i>                                                                                                             | Dry-Dry:<br>-45% to -21%<br><br>Wet-Dry:<br>-16% to +11%<br><br>Wet-Wet:<br>+2% to +15% | -                                                                                                                                                                          | Hall <i>et al.</i> ,<br>2017                 |
| Maumee,<br>OH/MI/IL<br>(17,207 km <sup>2</sup> )               | Mid<br>Century    | SWAT              | <b>Climate</b><br><i>Number: 3</i><br><i>Emissions: A1B</i><br><i>GCM: CMIP3</i><br><i>Downscaled:</i><br>BCSD                                                                                                      | -9%                                                                                     | <i>Nov. to Apr.:</i><br>Increase<br><i>May to Oct.:</i><br>Decrease                                                                                                        | Verma <i>et al.</i> ,<br>2015                |
|                                                                | Late<br>Century   |                   |                                                                                                                                                                                                                     | +4%                                                                                     | <i>Oct. to Apr.:</i><br>Increase<br><i>May to Sep.:</i><br>Decrease                                                                                                        |                                              |
| Green Lake, WI<br>(1 km <sup>2</sup> )                         | Early<br>Century  | WEPP-<br>WQ       | <b>Climate</b><br><i>Number: 2</i>                                                                                                                                                                                  | <b>A2: +42%</b><br><b>A1B: +28%</b><br><b>B1: +38%</b>                                  | <i>Winter: increase</i><br><i>Spring: increase</i>                                                                                                                         | Wang <i>et al.</i> ,<br>2018                 |

| Watershed<br>(Drainage Area)                                             | Future<br>Period* | Water<br>Model(s) | Scenarios Used to<br>Drive Water<br>Model                                                                                                                                                            | Projected Changes in Load (%)                            |                                                                                                                                                                                 | Citation                                     |
|--------------------------------------------------------------------------|-------------------|-------------------|------------------------------------------------------------------------------------------------------------------------------------------------------------------------------------------------------|----------------------------------------------------------|---------------------------------------------------------------------------------------------------------------------------------------------------------------------------------|----------------------------------------------|
|                                                                          |                   |                   |                                                                                                                                                                                                      | Annual Median<br>(Range)                                 | Seasonal<br>Median<br>(Range)                                                                                                                                                   |                                              |
|                                                                          | Mid<br>Century    |                   | <i>Emissions: A2,<br/>A1B, B1<br/>GCM: CMIP3</i>                                                                                                                                                     | <b>A2:</b> +54%<br><b>A1B:</b> +44%<br><b>B1:</b> +41%   | <i>Summer:</i><br>decrease<br><i>Fall:</i> increase                                                                                                                             |                                              |
|                                                                          | Late<br>Century   |                   |                                                                                                                                                                                                      | <b>A2:</b> +89%<br><b>A1B:</b> +75%<br><b>B1:</b> +72%   |                                                                                                                                                                                 |                                              |
| Walworth<br>Watershed, WI<br>(1 km <sup>2</sup> )                        | Early<br>Century  |                   |                                                                                                                                                                                                      | <b>A2:</b> +31%<br><b>A1B:</b> +27%<br><b>B1:</b> +25%   | <i>Winter:</i> increase<br><i>Spring:</i> increase<br><i>Summer:</i><br>decrease<br><i>Fall:</i> increase                                                                       |                                              |
|                                                                          | Mid<br>Century    |                   |                                                                                                                                                                                                      | <b>A2:</b> +81%<br><b>A1B:</b> +88%<br><b>B1:</b> +72%   |                                                                                                                                                                                 |                                              |
|                                                                          | Late<br>Century   |                   |                                                                                                                                                                                                      | <b>A2:</b> +109%<br><b>A1B:</b> +96%<br><b>B1:</b> +106% |                                                                                                                                                                                 |                                              |
| Tongue, MT/WY<br>(14,004 km <sup>2</sup> )                               | Mid<br>Century    | SWAT              | <b>Climate</b><br><i>Number: 6<br/>Emissions: A2<br/>(Future CO<sub>2</sub><br/>effects on ET also<br/>simulated)<br/>GCM: CMIP3<br/>Downscaled:<br/>NARCCAP</i><br><br><b>Land use</b><br>EPA ICLUS | +28%<br>(-33% to +224%)                                  | <i>Winter:</i> +151%<br>(+88% to<br>+428%)<br><i>Spring:</i> +29%<br>(-11% to<br>+173%)<br><i>Summer:</i> +21%<br>(-50% to<br>+224%)<br><i>Fall:</i> +50%<br>(-59% to<br>+576%) | Johnson <i>et al.</i> , 2015;<br>USEPA, 2013 |
| Elkhorn, NE<br>(18,133 km <sup>2</sup> )                                 |                   |                   |                                                                                                                                                                                                      | +31%<br>(-35% to +47%)                                   | <i>Winter:</i> +46%<br>(+6% to +69%)<br><i>Spring:</i> +39%<br>(-18% to +58%)<br><i>Summer:</i> +6%<br>(-62% to +32%)<br><i>Fall:</i> +61%<br>(-34% to +91%)                    |                                              |
| Trinity, TX<br>(46,488 km <sup>2</sup> )                                 |                   |                   |                                                                                                                                                                                                      | +32%<br>(-17% to +63%)                                   | <i>Winter:</i> +31%<br>(-22% to +43%)<br><i>Spring:</i> +30%<br>(-11% to +88%)<br><i>Summer:</i> +13%<br>(+2% to +132%)<br><i>Fall:</i> +21%<br>(-42% to +85%)                  |                                              |
| Lake Winnipeg<br>Watershed,<br>Saskatchewan<br>(13,500 km <sup>2</sup> ) | Mid<br>Century    | SWAT              | <b>Climate</b><br><i>Number: 3<br/>Emissions: A2<br/>GCM: NARCCAP<br/>Downscaled:<br/>GCDC/NARR</i>                                                                                                  | +5%<br>(-18% to +19%)                                    | -                                                                                                                                                                               | Shrestha <i>et al.</i> , 2012                |

| Watershed<br>(Drainage Area)                       | Future<br>Period* | Water<br>Model(s) | Scenarios Used to<br>Drive Water<br>Model                                                                                                                                                                           | Projected Changes in Load (%) |                                                                                                                                                                       | Citation                                     |
|----------------------------------------------------|-------------------|-------------------|---------------------------------------------------------------------------------------------------------------------------------------------------------------------------------------------------------------------|-------------------------------|-----------------------------------------------------------------------------------------------------------------------------------------------------------------------|----------------------------------------------|
|                                                    |                   |                   |                                                                                                                                                                                                                     | Annual Median<br>(Range)      | Seasonal<br>Median<br>(Range)                                                                                                                                         |                                              |
| South Platte, CO<br>(37,991 km <sup>2</sup> )      | Mid<br>Century    | SWAT              | <b>Climate</b><br><i>Number: 6</i><br><i>Emissions: A2</i><br>(Future CO <sub>2</sub><br>effects on ET also<br>simulated)<br><i>GCM: CMIP3</i><br><i>Downscaled:</i><br>NARCAAP<br><br><b>Land use</b><br>EPA ICLUS | -6%<br>(-28% to +10%)         | <i>Winter: +4%</i><br>(0% to +18%)<br><i>Spring: +7%</i><br>(-11% to +43%)<br><i>Summer: -19%</i><br>(-51% to 0%)<br><i>Fall: -9%</i><br>(-17% to +15%)               | Johnson <i>et al.</i> , 2015;<br>USEPA, 2013 |
| Upper Colorado,<br>CO<br>(46,271 km <sup>2</sup> ) |                   |                   |                                                                                                                                                                                                                     | -16%<br>(-21% to +19%)        | <i>Winter: -13%</i><br>(-18% to +25%)<br><i>Spring: -5%</i><br>(-9% to +28%)<br><i>Summer: -26%</i><br>(-30% to +8%)<br><i>Fall: -18%</i><br>(-24% to +22%)           |                                              |
| Rio Grande,<br>CO/NM<br>(49,104 km <sup>2</sup> )  |                   |                   |                                                                                                                                                                                                                     | -47%<br>(-59% to +27%)        | <i>Winter: -20%</i><br>(-24% to +13%)<br><i>Spring: -64%</i><br>(-78% to +38%)<br><i>Summer: -37%</i><br>(-55% to +16%)<br><i>Fall: -5%</i><br>(-10% to +4%)          |                                              |
| Salt, AZ<br>(15,025 km <sup>2</sup> )              |                   |                   |                                                                                                                                                                                                                     | -15%<br>(-30% to +54%)        | <i>Winter: -18%</i><br>(-64% to +32%)<br><i>Spring: -38%</i><br>(-66% to -8%)<br><i>Summer: +50%</i><br>(-75% to<br>+449%)<br><i>Fall: -14%</i><br>(-44% to<br>+193%) |                                              |
| Los Angeles, CA<br>(2,172 km <sup>2</sup> )        |                   |                   |                                                                                                                                                                                                                     | -39%<br>(-48% to -13%)        | <i>Winter: -42%</i><br>(-53% to -23%)<br><i>Spring: -45%</i><br>(-59% to -11%)<br><i>Summer: +1%</i><br>(-12% to +32%)<br><i>Fall: -2%</i><br>(-8% to +33%)           |                                              |
| Sacramento, CA<br>(21,537 km <sup>2</sup> )        |                   |                   |                                                                                                                                                                                                                     | +1%<br>(-15% to +14%)         | <i>Winter: -17%</i><br>(-27% to -9%)<br><i>Spring: +4%</i><br>(-7% to +29%)<br><i>Summer: 0%</i><br>(-7% to +56%)<br><i>Fall: +19%</i><br>(-3% to +42%)               |                                              |



| Watershed<br>(Drainage Area)                                                 | Future<br>Period* | Water<br>Model(s) | Scenarios Used to<br>Drive Water<br>Model                                                                                                                                                                           | Projected Changes in Load (%) |                                                                                                                                                    | Citation                                     |
|------------------------------------------------------------------------------|-------------------|-------------------|---------------------------------------------------------------------------------------------------------------------------------------------------------------------------------------------------------------------|-------------------------------|----------------------------------------------------------------------------------------------------------------------------------------------------|----------------------------------------------|
|                                                                              |                   |                   |                                                                                                                                                                                                                     | Annual Median<br>(Range)      | Seasonal<br>Median<br>(Range)                                                                                                                      |                                              |
| Northern San<br>Joaquin Valley<br>watershed, CA<br>(14,976 km <sup>2</sup> ) | Late<br>Century   | SWAT              | <b>Climate</b><br>(Synthetic<br>Scenarios)<br><i>Temp.:</i> +1.1 °C to<br>+6.4 °C<br><i>Precip.:</i> 0%,<br>±10%, ±20%                                                                                              | -37% to 40%                   | -                                                                                                                                                  | Ficklin <i>et al.</i> ,<br>2010              |
| Willamette<br>River, OR<br>(29,031 km <sup>2</sup> )                         | Mid<br>Century    | SWAT              | <b>Climate</b><br><i>Number:</i> 6<br><i>Emissions:</i> A2<br>(Future CO <sub>2</sub><br>effects on ET also<br>simulated)<br><i>GCM:</i> CMIP3<br><i>Downscaled:</i><br>NARCCAP<br><br><b>Land use</b><br>EPA ICLUS | -3%<br>(-6% to 0%)            | <i>Winter:</i> -6%<br>(-8% to -2%)<br><i>Spring:</i> -2%<br>(-9% to +6%)<br><i>Summer:</i> -1%<br>(-5% to +3%)<br><i>Fall:</i> 0%<br>(-10% to +2%) | Johnson <i>et al.</i> , 2015;<br>USEPA, 2013 |
| Tualatin, OR<br>(4781 km <sup>2</sup> )                                      | Mid<br>century    | HSPF              | <b>Climate</b><br><i>Number:</i> 8<br><i>Emissions:</i> A1B,<br>B1<br><i>GCM:</i> CMIP3                                                                                                                             | +12%                          | Winter: +16%<br>Spring: -2%<br>Summer: -8%<br>Fall: +43%                                                                                           | Praskievicz<br>and Chang,<br>2011            |
|                                                                              | Late<br>Century   |                   |                                                                                                                                                                                                                     | +21%                          | Winter: +26%<br>Spring: +4%<br>Summer: -9%<br>Fall: +62%                                                                                           |                                              |

\*Early Century: 2020–2040, Mid-Century: 2041–2070, and Late Century: 2071–2100.

**Table S-3. Projected sediment load responses to future climate changes scenarios. Information is adapted from published scientific literature identified in this review.**

| Watershed (Drainage Area)                                                | Future Period* | Water Model(s) | Scenario(s) Used to Drive Water Models                                                                                                                                                                     | Projected Load Changes (%)                                                                       |                                                                                                                                                                    | Citation                    |
|--------------------------------------------------------------------------|----------------|----------------|------------------------------------------------------------------------------------------------------------------------------------------------------------------------------------------------------------|--------------------------------------------------------------------------------------------------|--------------------------------------------------------------------------------------------------------------------------------------------------------------------|-----------------------------|
|                                                                          |                |                |                                                                                                                                                                                                            | Annual Median (Range)                                                                            | Seasonal Median (Range)                                                                                                                                            |                             |
| Merrimack River, NE (12,965 km <sup>2</sup> )                            | Mid Century    | SWAT           | <b>Climate</b><br><i>Number: 6</i><br><i>Emissions: A2</i><br>(Future CO <sub>2</sub> effects on ET also simulated)<br><i>GCM: CMIP3</i><br><i>Downscaled: NARCCAP</i><br><br><b>Land use</b><br>EPA ICLUS | +18%<br>(-15% to +28%)                                                                           | <i>Winter: +90%</i><br>(+52% to +123%)<br><i>Spring: -5%</i><br>(-41% to +9%)<br><i>Summer: +6%</i><br>(-9% to +57%)<br><i>Fall: -2%</i><br>(-20% to +54%)         | USEPA, 2013                 |
| Susquehanna River, PA (71,236 km <sup>2</sup> )                          |                |                |                                                                                                                                                                                                            | +12%<br>(-16% to +18%)                                                                           | <i>Winter: +67%</i><br>(+40% to 93%)<br><i>Spring: 0%</i><br>(-32% to +13%)<br><i>Summer: -15%</i><br>(-33% to +28%)<br><i>Fall: -1%</i><br>(-28% to +34%)         |                             |
| Susquehanna River, PA (71,236 km <sup>2</sup> )                          | Mid Century    | SWAT           | <b>Climate</b><br><i>Number: 6</i><br><i>Emissions: RCP 8.5, RCP 2.6</i><br><i>GCM: CMIP5</i><br><i>Downscaled: WCRP</i>                                                                                   | +26%<br>(+9% to +60%)                                                                            | -                                                                                                                                                                  | Wagena & Easton, 2018       |
|                                                                          | Late Century   |                |                                                                                                                                                                                                            | +31%<br>(+14% to +72%)                                                                           |                                                                                                                                                                    |                             |
| St. Lawrence River, Canada (19 watersheds)                               | Early Century  | Statistical    | <b>Climate</b><br><i>Emissions: B1, A1B, A2</i><br><i>GCM: CGCM3</i><br><i>Downscaled: CCCma</i>                                                                                                           | <i>B1: +1.7%<sup>a/</sup></i><br><i>A1B: +1.6%<sup>a/</sup></i><br><i>A2: +1.8%<sup>a/</sup></i> | <i>Winter: 1% to +3%<sup>a/</sup></i><br><i>Spring: 1% to +4%<sup>a/</sup></i><br><i>Summer: -2% to +3%<sup>a/</sup></i><br><i>Fall: 0.25% to +1%<sup>a/</sup></i> | Delpla and Rodriguez, 2014  |
| WE-38 experimental watershed, Mahantango Creek, PA (73 km <sup>2</sup> ) | Mid Century    | SWAT           | <b>Climate</b><br><i>Number: 7</i><br><i>Emissions: A2</i><br><i>GCM: CMIP3</i><br><i>Downscaled: NARCAAP</i>                                                                                              | +8%<br>(-10% to +32%)                                                                            | Winter/spring: +25%<br>(+7% to +44%)<br>Summer/fall: -9%<br>(-30% to +5%)                                                                                          | Wagena <i>et al.</i> , 2018 |

| Watershed<br>(Drainage Area)                                         | Future<br>Period* | Water<br>Model(s) | Scenario(s) Used to<br>Drive Water Models                                                                                                                                            | Projected Load Changes (%) |                                                                                                                                      | Citation                             |
|----------------------------------------------------------------------|-------------------|-------------------|--------------------------------------------------------------------------------------------------------------------------------------------------------------------------------------|----------------------------|--------------------------------------------------------------------------------------------------------------------------------------|--------------------------------------|
|                                                                      |                   |                   |                                                                                                                                                                                      | Annual Median<br>(Range)   | Seasonal Median<br>(Range)                                                                                                           |                                      |
| Cannonsville<br>Reservoir<br>Watershed, NY<br>(891 km <sup>2</sup> ) | Late<br>Century   | SWAT-<br>WB       | <b>Climate</b><br>Number: 9<br>Emissions: A1B<br>GCM: CGCM3                                                                                                                          | +4%<br>(-7% to +26%)       | Winter/Spring:<br>increase<br>Summer/Fall:<br>decrease                                                                               | Mukundan<br><i>et al.</i> ,<br>2013a |
| Esopus Creek,<br>NY<br>(493 km <sup>2</sup> )                        | Mid<br>Century    | GWL-<br>VSA       | <b>Climate</b><br>Number: 5<br>Emissions: B1, A1B,<br>A2                                                                                                                             | +3% <sup>a/</sup>          | Winter: +45% <sup>a/</sup>                                                                                                           | Mukundan<br><i>et al.</i> ,<br>2013b |
|                                                                      | Late<br>Century   |                   |                                                                                                                                                                                      | +5% <sup>a/</sup>          | Winter: +68% <sup>a/</sup>                                                                                                           |                                      |
| Neuse River, NC<br>(25,828 km <sup>2</sup> )                         | Mid<br>Century    | SWAT              | <b>Climate</b><br>Number: 6<br>Emissions: A2<br>(Future CO <sub>2</sub> effects<br>on ET also simulated)<br>GCM: CMIP3<br>Downscaled:<br>NARCCAP<br><br><b>Land use</b><br>EPA ICLUS | +29%<br>(-18% to +99%)     | Winter: +24%<br>(-5% to +36%)<br>Spring: +15%<br>(+5% to +29%)<br>Summer: +24%<br>(-57% to +161%)<br>Fall: +43%<br>(-34% to +216%)   | USEPA,<br>2013                       |
| Suwannee River,<br>FL<br>(25,765 km <sup>2</sup> )                   |                   |                   |                                                                                                                                                                                      | +30%<br>(-26% to +81%)     | Winter: +43%<br>(-34% to +159%)<br>Spring: +30%<br>(-28% to +53%)<br>Summer: +23%<br>(-26% to +66%)<br>Fall: +27%<br>(-35% to +155%) |                                      |
| Apalachicola<br>River, FL<br>(49,943 km <sup>2</sup> )               |                   |                   |                                                                                                                                                                                      | +27%<br>(-47% to +46%)     | Winter: +29%<br>(-50% to +78%)<br>Spring: +31%<br>(-26% to +42%)<br>Summer: +14%<br>(-69% to +27%)<br>Fall: +27%<br>(-66% to +97%)   |                                      |
| Amite River, LA<br>(8,606 km <sup>2</sup> )                          |                   |                   |                                                                                                                                                                                      | +8%<br>(-30% to +31%)      | Winter: +7%<br>(-24% to +51%)<br>Spring: +14%<br>(-32% to +56%)<br>Summer: -50%<br>(-69% to +10%)<br>Fall: +7%<br>(-13% to +68%)     |                                      |

| Watershed<br>(Drainage Area)                                        | Future<br>Period* | Water<br>Model(s) | Scenario(s) Used to<br>Drive Water Models                                                                                                                                    | Projected Load Changes (%) |                                                                                                                                                                | Citation                      |
|---------------------------------------------------------------------|-------------------|-------------------|------------------------------------------------------------------------------------------------------------------------------------------------------------------------------|----------------------------|----------------------------------------------------------------------------------------------------------------------------------------------------------------|-------------------------------|
|                                                                     |                   |                   |                                                                                                                                                                              | Annual Median<br>(Range)   | Seasonal Median<br>(Range)                                                                                                                                     |                               |
| Apalachicola<br>River, FL<br>(49,943 km <sup>2</sup> )              | Late<br>Century   | SWAT              | <b>Climate</b><br><i>Emissions: A2, A1B,<br/>B1</i><br><i>GCM: HadCM3,<br/>IPCM4, MPEH5</i>                                                                                  |                            | <b>HASCM3</b> <sup>b/</sup><br><i>Winter:</i><br>increase<br><i>Spring:</i><br>increase<br><i>Summer:</i><br>decrease<br><i>Fall:</i><br>increase              | Hovenga <i>et al.</i> , 2016  |
|                                                                     |                   |                   |                                                                                                                                                                              |                            | <b>IPCM4</b> <sup>b/</sup><br><i>Winter:</i><br>decrease<br><i>Spring:</i><br>decrease<br><i>Summer:</i><br>decrease<br><i>Fall:</i><br>increase               |                               |
|                                                                     |                   |                   |                                                                                                                                                                              |                            | <b>MPEH5</b> <sup>b/</sup><br><i>Winter:</i><br>increase<br><i>Spring:</i><br>little change<br><i>Summer:</i><br>increase<br><i>Fall:</i><br>increase          |                               |
| Big Sunflower<br>River<br>Watershed, MS<br>(7,660 km <sup>2</sup> ) | Mid<br>Century    | SWAT              | <b>Climate</b><br><i>Emissions: A1B, A2,<br/>and B1</i><br><i>GCM: CCSM3</i>                                                                                                 | +6.3% to +6.4%             | -                                                                                                                                                              | Parajuli <i>et al.</i> , 2016 |
|                                                                     | Late<br>Century   |                   |                                                                                                                                                                              |                            |                                                                                                                                                                |                               |
| Apalachicola<br>River, FL<br>(3,589 km <sup>2</sup> )               | Mid<br>Century    | SWAT              | <b>Climate</b><br><i>GCM: CMIP3</i><br><i>Downscaled:</i><br>NARCCAP                                                                                                         | -                          | <i>Min:</i><br>-15% in October<br><i>Max:</i><br>+30% in July                                                                                                  | Chen <i>et al.</i> ,<br>2014  |
| Maumee,<br>OH/MI/IN<br>(17,207 km <sup>2</sup> )                    | Mid<br>Century    | SWAT              | <b>Climate</b><br><i>Number: 6</i><br><i>Emissions: A2</i><br>(Future CO <sub>2</sub> effects<br>on ET also simulated)<br><i>GCM: CMIP3</i><br><i>Downscaled:</i><br>NARCCAP | +28%<br>(-14% to +69%)     | <i>Winter:</i> +46%<br>(+14% to +84%)<br><i>Spring:</i> +21%<br>(-17% to +52%)<br><i>Summer:</i> +10%<br>(-60% to +85%)<br><i>Fall:</i> +59%<br>(-7% to +163%) | USEPA,<br>2013                |

| Watershed<br>(Drainage Area)                                   | Future<br>Period* | Water<br>Model(s) | Scenario(s) Used to<br>Drive Water Models                                                                        | Projected Load Changes (%)                                     |                                                                                                                                          | Citation                     |
|----------------------------------------------------------------|-------------------|-------------------|------------------------------------------------------------------------------------------------------------------|----------------------------------------------------------------|------------------------------------------------------------------------------------------------------------------------------------------|------------------------------|
|                                                                |                   |                   |                                                                                                                  | Annual Median<br>(Range)                                       | Seasonal Median<br>(Range)                                                                                                               |                              |
| Illinois,<br>IL/WI/IN<br>(44,040 km <sup>2</sup> )             |                   |                   | <b>Land use</b><br>EPA ICLUS                                                                                     | +18%<br>(-10% to +42%)                                         | Winter: +24%<br>(-11% to +56%)<br>Spring: +23%<br>(+6% to +41%)<br>Summer: +14%<br>(-13% to +41%)<br>Fall: +12%<br>(-32% to +55%)        |                              |
| Minnesota, MN<br>(44,002 km <sup>2</sup> )                     |                   |                   |                                                                                                                  | +53%<br>(-23% to +125%)                                        | Winter: +262%<br>(+153% to +460%)<br>Spring: +21%<br>(-27% to +69%)<br>Summer: +45%<br>(-66% to +164%)<br>Fall: +103%<br>(-47% to +406%) |                              |
| Maumee,<br>OH/MI/IN<br>(17,207 km <sup>2</sup> )               | Mid<br>Century    | SWAT              | <b>Climate</b><br>Number: 6<br>Emissions: RCP 2.6,<br>4.5, 6.0, 8.5<br>GCM: CMIP5 (19)<br>Downscaled:<br>NARCCAP | RCP 2.6: -26%<br>RCP 4.5: -24%<br>RCP 6: -25%<br>RCP 8.5: -3%  | Winter:<br>-33% to +10%<br>Spring:<br>-18% to +1%<br>Summer:<br>-40% to -26%<br>Fall:<br>-30% to -20%                                    | Cousino <i>et al.</i> , 2015 |
|                                                                | Late<br>Century   |                   |                                                                                                                  | RCP 2.6: -26%<br>RCP 4.5: -12%<br>RCP 6: -10%<br>RCP 8.5: +11% | Winter:<br>-37% to +58%<br>Spring:<br>-20% to +12%<br>Summer:<br>-51% to -18%<br>Fall:<br>-29% to -17%                                   |                              |
| Cedar Creek (3<br>watersheds), IN<br>(679 km <sup>2</sup> )    | Late<br>Century   | SWAT              | <b>Climate</b><br>Number: 17<br>Emissions: RCP 6.0<br>GCM: CMIP5                                                 | +1% to +139%                                                   | -                                                                                                                                        | Wallace <i>et al.</i> , 2017 |
| Saginaw Bay (4<br>watersheds), MI<br>(22,533 km <sup>2</sup> ) | Late<br>Century   | SWAT              | <b>Climate</b><br>Synthetic Scenarios<br>Number: 16<br>Emissions: A2<br>GCM: CMIP3                               | Dry-Dry:<br>-58% to -16%                                       | -                                                                                                                                        | Hall <i>et al.</i> ,<br>2017 |
|                                                                |                   |                   |                                                                                                                  | Wet-Dry:<br>-31% to +28%                                       |                                                                                                                                          |                              |
|                                                                |                   |                   |                                                                                                                  | Wet-Wet:<br>-7% to +27%                                        |                                                                                                                                          |                              |

| Watershed<br>(Drainage Area)                                                                                                                                                                                                                            | Future<br>Period* | Water<br>Model(s) | Scenario(s) Used to<br>Drive Water Models                                                                   | Projected Load Changes (%)                                                          |                            | Citation                     |
|---------------------------------------------------------------------------------------------------------------------------------------------------------------------------------------------------------------------------------------------------------|-------------------|-------------------|-------------------------------------------------------------------------------------------------------------|-------------------------------------------------------------------------------------|----------------------------|------------------------------|
|                                                                                                                                                                                                                                                         |                   |                   |                                                                                                             | Annual Median<br>(Range)                                                            | Seasonal Median<br>(Range) |                              |
| Little Miami<br>River, OH<br>(5,840 km <sup>2</sup> )                                                                                                                                                                                                   | Mid<br>Century    | SWAT              | <b>Climate</b><br>(Synthetic Scenarios)<br><i>Air temp: +2 to +4°C</i><br><i>Precipitation: ±20%</i>        | <i>Wettest: +47%</i><br><i>Wet: +46%</i><br><i>Dry: -41%</i><br><i>Driest: -41%</i> | -                          | Tong <i>et al.</i> ,<br>2007 |
| Eagle Creek<br>watershed,<br>Indiana (248<br>km <sup>2</sup> )                                                                                                                                                                                          | Early<br>Century  | SWAT              | <b>Climate</b><br><i>Number: 16</i><br><i>Emissions: A2, A1B,<br/>B1</i><br><i>GCM: CMIP3</i>               | Increases                                                                           | -                          | Ahmadi <i>et al.</i> , 2014  |
|                                                                                                                                                                                                                                                         | Mid<br>Century    |                   |                                                                                                             | Increases                                                                           |                            |                              |
|                                                                                                                                                                                                                                                         | Late<br>Century   |                   |                                                                                                             | Increases*                                                                          |                            |                              |
| Central WI<br>East central IN<br>/West central<br>OH<br>Eastern IL<br>Eastern WI<br>MI Thumb<br>North western<br>OH /South<br>eastern MI<br>South central MI<br>/Northern IN<br>Southern IL<br>South western<br>IN<br>South western<br>WI<br>Western IL | Mid<br>Century    | WEPP-<br>CO2      | <b>Climate</b><br><i>Emissions: IS95a</i><br><i>GCM: HadCM3</i>                                             | +150%                                                                               | -                          | O'Neal <i>et al.</i> , 2005  |
| +34%                                                                                                                                                                                                                                                    |                   |                   |                                                                                                             |                                                                                     |                            |                              |
| +32%                                                                                                                                                                                                                                                    |                   |                   |                                                                                                             |                                                                                     |                            |                              |
| +129%                                                                                                                                                                                                                                                   |                   |                   |                                                                                                             |                                                                                     |                            |                              |
| +105%                                                                                                                                                                                                                                                   |                   |                   |                                                                                                             |                                                                                     |                            |                              |
| +273%                                                                                                                                                                                                                                                   |                   |                   |                                                                                                             |                                                                                     |                            |                              |
| -3%                                                                                                                                                                                                                                                     |                   |                   |                                                                                                             |                                                                                     |                            |                              |
| +37%                                                                                                                                                                                                                                                    |                   |                   |                                                                                                             |                                                                                     |                            |                              |
| +18%                                                                                                                                                                                                                                                    |                   |                   |                                                                                                             |                                                                                     |                            |                              |
| +147%                                                                                                                                                                                                                                                   |                   |                   |                                                                                                             |                                                                                     |                            |                              |
| +18%                                                                                                                                                                                                                                                    |                   |                   |                                                                                                             |                                                                                     |                            |                              |
| Maumee,<br>OH/MI/IN<br>(16,395 km <sup>2</sup> )                                                                                                                                                                                                        | Mid<br>Century    | SWAT              | <b>Climate</b><br><i>Number: 3</i><br><i>Emissions: A1B</i><br><i>GCM: CMIP3</i><br><i>Downscaled: BCSD</i> | -10%<br>(-82% to +90%)                                                              | <i>Summer: decreases</i>   | Verma <i>et al.</i> , 2015   |
|                                                                                                                                                                                                                                                         | Late<br>Century   |                   |                                                                                                             | +10%<br>(-84% to +138%)                                                             |                            |                              |

| Watershed<br>(Drainage Area)                                | Future<br>Period* | Water<br>Model(s) | Scenario(s) Used to<br>Drive Water Models                                                                                                                                                                        | Projected Load Changes (%) |                                                                                                                                                                     | Citation       |
|-------------------------------------------------------------|-------------------|-------------------|------------------------------------------------------------------------------------------------------------------------------------------------------------------------------------------------------------------|----------------------------|---------------------------------------------------------------------------------------------------------------------------------------------------------------------|----------------|
|                                                             |                   |                   |                                                                                                                                                                                                                  | Annual Median<br>(Range)   | Seasonal Median<br>(Range)                                                                                                                                          |                |
| Tongue River,<br>WY/MT<br>(14,004 km <sup>2</sup> )         | Mid<br>Century    | SWAT              | <b>Climate</b><br><i>Number: 6</i><br><i>Emissions: A2</i><br>(Future CO <sub>2</sub> effects<br>on ET also simulated)<br><i>GCM: CMIP3</i><br><i>Downscaled:</i><br>NARCAAP<br><br><b>Land use</b><br>EPA ICLUS | +31%<br>(-34% to +251%)    | <i>Winter: +143%</i><br>(+79% to +318%)<br><i>Spring: +33%</i><br>(-18% to +170%)<br><i>Summer: +25%</i><br>(-50% to +273%)<br><i>Fall: +36%</i><br>(-61% to +554%) | USEPA,<br>2013 |
| Elkhorn River,<br>NE<br>(18,133 km <sup>2</sup> )           |                   |                   |                                                                                                                                                                                                                  | +39%<br>(-40% to +62%)     | <i>Winter: +121%</i><br>(+39% to +204%)<br><i>Spring: +47%</i><br>(-13% to +77%)<br><i>Summer: +6%</i><br>(-74% to +39%)<br><i>Fall: +92%</i><br>(-46% to +148%)    |                |
| Trinity River,<br>TX<br>(46,488 km <sup>2</sup> )           |                   |                   |                                                                                                                                                                                                                  | -27%<br>(-73% to +25%)     | <i>Winter: -23%</i><br>(-70% to +3%)<br><i>Spring: -21%</i><br>(-71% to +55%)<br><i>Summer: -52%</i><br>(-75% to +93%)<br><i>Fall: -43%</i><br>(-82% to +52%)       |                |
| South Platte, CO<br>(37,991 km <sup>2</sup> )               | Mid<br>Century    | SWAT              | <b>Climate</b><br><i>Number: 6</i><br><i>Emissions: A2</i><br>(Future CO <sub>2</sub> effects<br>on ET also simulated)<br><i>GCM: CMIP3</i><br><i>Downscaled:</i><br>NARCAAP<br><br><b>Land use</b><br>EPA ICLUS | -7%<br>(-20% to +4%)       | <i>Winter: +5%</i><br>(-4% to +11%)<br><i>Spring: -2%</i><br>(-9% to +19%)<br><i>Summer: -17%</i><br>(-33% to -6%)<br><i>Fall: -9%</i><br>(-24% to -1%)             | USEPA,<br>2013 |
| Upper Colorado<br>River, CO/UT<br>(46,271 km <sup>2</sup> ) |                   |                   |                                                                                                                                                                                                                  | -13%<br>(-20% to +24%)     | <i>Winter: -6%</i><br>(-16% to +38%)<br><i>Spring: +28%</i><br>(+26% to +55%)<br><i>Summer: -36%</i><br>(-39% to +4%)<br><i>Fall: -21%</i><br>(-35% to +35%)        |                |
| Rio Grande<br>Valley, NM, CO<br>(49,104 km <sup>2</sup> )   |                   |                   |                                                                                                                                                                                                                  | -41%<br>(-51% to +14%)     | <i>Winter: -45%</i><br>(-49% to +14%)<br><i>Spring: -24%</i><br>(-48% to +19%)<br><i>Summer: -33%</i><br>(-51% to +14%)<br><i>Fall: -49%</i><br>(-55% to +12%)      |                |

| Watershed<br>(Drainage Area)                                | Future<br>Period* | Water<br>Model(s) | Scenario(s) Used to<br>Drive Water Models                                                                       | Projected Load Changes (%)      |                                                                                                                                                                    | Citation                     |
|-------------------------------------------------------------|-------------------|-------------------|-----------------------------------------------------------------------------------------------------------------|---------------------------------|--------------------------------------------------------------------------------------------------------------------------------------------------------------------|------------------------------|
|                                                             |                   |                   |                                                                                                                 | Annual Median<br>(Range)        | Seasonal Median<br>(Range)                                                                                                                                         |                              |
| Salt River, AZ<br>(15,025 km <sup>2</sup> )                 |                   |                   |                                                                                                                 | -17%<br>(-34% to +83%)          | <i>Winter</i> : -9%<br>(-67% to +41%)<br><i>Spring</i> : -37%<br>(-74% to +5%)<br><i>Summer</i> : +95%<br>(-93% to +591%)<br><i>Fall</i> : -26%<br>(-57% to +248%) |                              |
| Los Angeles<br>River, CA<br>(2,172 km <sup>2</sup> )        |                   |                   |                                                                                                                 | -19%<br>(-35% to +10%)          | <i>Winter</i> : -11%<br>(-23% to +24%)<br><i>Spring</i> : -38%<br>(-57% to -15%)<br><i>Summer</i> : -2%<br>(-14% to +38%)<br><i>Fall</i> : -15%<br>(-28% to +41%)  |                              |
| Sacramento<br>River, CA<br>(21,537 km <sup>2</sup> )        |                   |                   |                                                                                                                 | +14%<br>(-7% to +38%)           | <i>Winter</i> : +26%<br>(-8% to +39%)<br><i>Spring</i> : -6%<br>(-43% to +51%)<br><i>Summer</i> : +52%<br>(+28% to +438%)<br><i>Fall</i> : -6%<br>(-38% to +52%)   |                              |
| Sacramento<br>River, CA<br>(23,300 km <sup>2</sup> )        | Late<br>Century   | SWAT              | <b>Climate</b><br>(Synthetic Scenarios)<br><i>Temp.</i> : +6.4°C<br><i>Precip.</i> : ±20%                       | <i>95% CI</i> :<br>-26% to +20% | <b>95%CI</b><br><i>Winter</i> :<br>-33% to +36%<br><i>Spring</i> :<br>-26% to +43%<br><i>Summer</i> :<br>-27% to +12%<br><i>Fall</i> :<br>-32% to +13%             | Ficklin <i>et al.</i> , 2013 |
| San Joaquin<br>River, CA<br>(14,983 km <sup>2</sup> )       |                   |                   |                                                                                                                 | <i>95% CI</i> :<br>-50% to +73% | <b>95%CI</b><br><i>Winter</i> :<br>-52% to +66%<br><i>Spring</i> :<br>-49% to +94%<br><i>Summer</i> :<br>-56% to +165%<br><i>Fall</i> :<br>-57% to +48%            |                              |
| Sierra Nevada,<br>CA<br>(703 to 15,789<br>km <sup>2</sup> ) | Mid<br>Century    | SWAT              | <b>Climate</b><br><i>Number</i> : 16<br><i>Emissions</i> : A2<br><i>GCM</i> : CMIP3<br><i>Downscaled</i> : WCRP | -                               | <i>Spring</i> : -46 <sup>cl</sup><br>(-60 to -12)<br><i>Summer</i> : -50 <sup>cl</sup><br>(-57 to +30)                                                             | Ficklin <i>et al.</i> , 2013 |
|                                                             | Late<br>Century   |                   |                                                                                                                 |                                 | <i>Spring</i> : -54 <sup>cl</sup><br>(-65 to -20)<br><i>Summer</i> : -50 <sup>cl</sup><br>(-60 to -23)                                                             |                              |



| Watershed (Drainage Area)                                                      | Future Period* | Water Model(s) | Scenario(s) Used to Drive Water Models                                                                                                                                                                     | Projected Load Changes (%)          |                                                                                                                                                   | Citation                     |
|--------------------------------------------------------------------------------|----------------|----------------|------------------------------------------------------------------------------------------------------------------------------------------------------------------------------------------------------------|-------------------------------------|---------------------------------------------------------------------------------------------------------------------------------------------------|------------------------------|
|                                                                                |                |                |                                                                                                                                                                                                            | Annual Median (Range)               | Seasonal Median (Range)                                                                                                                           |                              |
| Northern San Joaquin Valley watershed, CA (14,976 km <sup>2</sup> )            | Late Century   | SWAT           | <b>Climate</b><br>(Synthetic Scenarios)<br><i>Temp: +1.1 °C to +6.4 °C</i><br><i>Precip: 0%, ±10%, ±20%</i>                                                                                                | -27% to +28%                        | -                                                                                                                                                 | Ficklin <i>et al.</i> , 2010 |
|                                                                                |                |                | <i>Climate + CO<sub>2</sub> (970 ppm)</i>                                                                                                                                                                  | -6 % to +25%                        |                                                                                                                                                   |                              |
| San Francisco Estuary Watershed (Sacramento-San Joaquin watersheds and Deltas) | Late Century   | VIC            | <b>Climate</b><br><i>Number: 2</i><br><i>Emissions: B1, A2</i><br><i>GCM: PCM-B1, GFDL-A2</i>                                                                                                              | <i>B1:</i> decreases                | -                                                                                                                                                 | Cloern <i>et al.</i> , 2011  |
|                                                                                |                |                |                                                                                                                                                                                                            | <i>A2:</i> decreases                |                                                                                                                                                   |                              |
| Willamette River, OR (29,032 km <sup>2</sup> )                                 | Mid Century    | SWAT           | <b>Climate</b><br><i>Number: 6</i><br><i>Emissions: A2</i><br>(Future CO <sub>2</sub> effects on ET also simulated)<br><i>GCM: CMIP3</i><br><i>Downscaled: NARCCAP</i><br><br><b>Land use</b><br>EPA ICLUS | +10%<br>(-13% to +19%)              | <i>Winter: +10% (-10% to +24%)</i><br><i>Spring: +8% (-12% to +40%)</i><br><i>Summer: +13% (-27% to +50%)</i><br><i>Fall: +21% (-25% to +34%)</i> | USEPA, 2013                  |
| Bull Run watershed, OR (264 km <sup>2</sup> )                                  | Early Century  | GEV            | <b>Climate</b><br><i>Emissions: A2</i><br><i>GCM: CMIP3</i><br><i>Downscaled: WCRP</i>                                                                                                                     | +0.30% <sup>b/</sup><br>(0 to +3%)  | -                                                                                                                                                 | Towler <i>et al.</i> , 2010  |
|                                                                                | Mid Century    |                |                                                                                                                                                                                                            | +0.80% <sup>b/</sup><br>(0 to +7%)  |                                                                                                                                                   |                              |
|                                                                                | Late Century   |                |                                                                                                                                                                                                            | +1.20% <sup>b/</sup><br>(0 to +11%) |                                                                                                                                                   |                              |
| Tucannon, OR (1,116 km <sup>2</sup> )                                          | Mid Century    | SWAT           | <b>Climate</b><br><i>Number: 10</i><br><i>Emission: A2</i><br><i>GCM: CMIP3</i><br><i>Downscaled: NARCCAP</i>                                                                                              | -18%                                | <i>Winter: -14% (+24% to +8%)</i><br><i>Summer: -5% (-60% to +98%)</i>                                                                            | Praskievicz, 2016            |
| South Fork Coeur d'Alene, ID (743 km <sup>2</sup> )                            |                |                |                                                                                                                                                                                                            | -18%                                | <i>Winter: +88% (+79% to +94%)</i><br><i>Summer: -72% (-73% to -60%)</i>                                                                          |                              |

| Watershed<br>(Drainage Area)            | Future<br>Period* | Water<br>Model(s) | Scenario(s) Used to<br>Drive Water Models                                            | Projected Load Changes (%) |                                                                                                                                        | Citation                          |
|-----------------------------------------|-------------------|-------------------|--------------------------------------------------------------------------------------|----------------------------|----------------------------------------------------------------------------------------------------------------------------------------|-----------------------------------|
|                                         |                   |                   |                                                                                      | Annual Median<br>(Range)   | Seasonal Median<br>(Range)                                                                                                             |                                   |
| Red River, ID<br>(99 km <sup>2</sup> )  |                   |                   |                                                                                      | -8%                        | <i>Winter:</i> -14%<br>(-24% to -6%)<br><i>Summer:</i> -26%<br>(-43% to -4%)                                                           |                                   |
| Tualatin, OR<br>(4781 km <sup>2</sup> ) | Mid<br>century    | HSPF              | <b>Climate</b><br><i>Number: 8</i><br><i>Emissions: A1B, B1</i><br><i>GCM: CMIP3</i> | +252%                      | <i>Winter:</i><br>+261% to +451%<br><i>Spring:</i><br>+129% to +164%<br><i>Summer:</i><br>-67 to +54%<br><i>Fall:</i><br>+430 to +595% | Praskievicz<br>and Chang,<br>2011 |
|                                         | Late<br>Century   |                   |                                                                                      | +245%                      | <i>Winter:</i><br>+259% to +436%<br><i>Spring:</i><br>+41% to +53%<br><i>Summer:</i><br>-81% to -52%<br><i>Fall:</i><br>+503% to +812% |                                   |

\*Early Century: 2020–2040, Mid-Century: 2041–2070, and Late Century: 2071–2100.

a/ Change in turbidity

b/ Estimated from graph (Figure 3 in Hovenga *et al.*, 2016), values listed for is range of monthly changes (HADCM3, IPCM4, MPEH5).

c/ Study assessed sediment concentrations.

**Table S-4. Projected fecal indicator bacteria (FIB) load responses to future climate changes scenarios. Information is adapted from published scientific literature identified in this review.**

| Watershed (Drainage Area)                      | Future Period* | Water Model(s) | Scenarios Used to Drive Water Models                                                                                       | Projected FIB Changes (%)                      |                                                                                                 | Citation                      |
|------------------------------------------------|----------------|----------------|----------------------------------------------------------------------------------------------------------------------------|------------------------------------------------|-------------------------------------------------------------------------------------------------|-------------------------------|
|                                                |                |                |                                                                                                                            | Annual Median                                  | Seasonal Median                                                                                 |                               |
| Pigg River, VA (1,015 km <sup>2</sup> )        | Mid Century    | HSPF           | <b>Climate</b><br><i>Number: 7</i><br><i>Emissions: B2</i><br><i>GCM: CMIP3</i><br><br><b>Land use</b><br>1 (many sources) | <i>Low flow years:</i><br>+49% <sup>a/</sup> L | <i>Winter: +41% L</i><br><i>Spring: -33% L</i><br><i>Summer: +10% L</i><br><i>Fall: +212%</i>   | Coffey <i>et al.</i> , 2015b  |
|                                                |                |                |                                                                                                                            | <i>Average flow years</i><br>+4% L             | <i>Winter: +22% L</i><br><i>Spring: -26% L</i><br><i>Summer: -22% L</i><br><i>Fall: +106% L</i> |                               |
|                                                |                |                |                                                                                                                            | <i>High flow years:</i><br>+21% L              | <i>Winter: +81% L</i><br><i>Spring: -17% L</i><br><i>Summer: -14% L</i><br><i>Fall: +50% L</i>  |                               |
| Upper Pearl River, MS (7,588 km <sup>2</sup> ) | Mid Century    | SWAT           | <b>Climate</b><br><i>Number: 1</i><br><i>Emissions: A1B</i><br><i>GCM: CMIP3</i>                                           | +175% <sup>b/</sup> C<br>(< 0% to > +900%)     | <i>Winter/Spring: decreases</i><br><i>Summer/Fall: increases</i>                                | Jayakody <i>et al.</i> , 2015 |
|                                                | Late Century   |                |                                                                                                                            | +297% C<br>(< 0% to > +900%)                   | <i>Winter/Spring: decreases</i><br><i>Summer/Fall: increases</i>                                |                               |

\*Early Century: 2020–2040, Mid-Century: 2041–2070, and Late Century: 2071–2100.

a/ L denotes change in load in response to climate change scenarios only.

b/ C denotes change in concentration.

**Table S-5. Occurrence of waterborne disease outbreaks following weather events in the U.S.**

Adapted from Rizak and Hrudey, 2008.

| Year      | Location                         | Pathogen                                            | Outbreak Characteristics/<br>Contributing Factors                    | Reference                                                                                                     |
|-----------|----------------------------------|-----------------------------------------------------|----------------------------------------------------------------------|---------------------------------------------------------------------------------------------------------------|
| 1999      | Washington County Fair, New York | <i>E. coli</i> O157:H7, <i>Campylobacter jejuni</i> | Drought conditions followed by heavy rainfall, sewage contamination  | Novello, 2000                                                                                                 |
| 1979      | Bradford, Pennsylvania           | <i>Giardia lamblia</i>                              | Heavy rainfall, inappropriate treatment                              | Lippy, 1981                                                                                                   |
| 1978      | Bennington, Vermont              | <i>Campylobacter jejuni</i>                         | Heavy rainfall, potential sewage contamination                       | Vogt <i>et al.</i> , 1982                                                                                     |
| 1993      | Milwaukee, Wisconsin             | <i>Cryptosporidium parvum</i>                       | Severe winter storms and heavy runoff, sewage effluent contamination | MacKenzie <i>et al.</i> , 1994; Fox and Lytle, 1996; Peng <i>et al.</i> , 1997; Sulaiman <i>et al.</i> , 1998 |
| 1989/1990 | Cabool, Missouri                 | <i>E. coli</i> O157:H7                              | Extreme cold temperatures, sewage contamination                      | Swerdlow <i>et al.</i> , 1992                                                                                 |
| 1993      | Gideon, Missouri                 | <i>Salmonella typhimurium</i>                       | Extreme cold temperatures, contamination of storage facilities       | Clark <i>et al.</i> , 1996; Angulo <i>et</i>                                                                  |
| 1998      | Brushy Creek, Texas              | <i>Cryptosporidium parvum</i>                       | Drought conditions, extreme high temperatures, sewage contamination  | TDOH, 1999                                                                                                    |
| 1980      | Georgetown, Texas                | Coxsackievirus B3; hepatitis A                      | Heavy rainfall, sewage contamination                                 | Hejkal <i>et al.</i> , 1982                                                                                   |
| 1998      | Alpine, Wyoming                  | <i>E. coli</i> O157:H7                              | Heavy rainfall, potential contamination from wildlife                | Olsen <i>et al.</i> , 2002                                                                                    |
| 1980      | Red Lodge, Montana               | <i>Giardia lamblia</i>                              | Heavy runoff, volcanic ashfall                                       | Weniger <i>et al.</i> , 1983                                                                                  |

## Literature Cited

- Ahmadi, M., R. Records, and M. Arabi., 2014. Impact of climate change on diffuse pollutant fluxes at the watershed scale. *Hydrological Processes* 28:1962-1972. <https://doi.org/10.1002/hyp.9723>
- Angulo, F. J., S. Tippen, D. J. Sharp, B. J. Payne, C. Collier, J. E. Hill, T. J. Barrett, R. M. Clark, E. E. Geldreich, H. D. Donnell, and D. L. Swerdlow. 1997. A community waterborne outbreak of salmonellosis and the effectiveness of a boil water order. *American Journal of Public Health* 87:580-584.
- Chen, X., K. Alizad, D. Wang, and S. C. Hagen., 2014. Climate change impact on runoff and sediment loads to the Apalachicola River at seasonal and event scales. *Journal of Coastal Research* 68:35-42. <https://doi.org/10.2112/SI68-005.1>
- Clark, R. M., E. E. Geldreich, K. R. Fox, E. W. Rice, C. H. Johnson, J. A. Goodrich, J. A. Barnick, and F. Abdesaken. 1996. Tracking a Salmonella serovar typhimurium outbreak in Gideon, Missouri: Role of contaminant propagation modelling. *Journal of Water Supply Research and Technology-Aqua* 45:171-183.
- Cloern, J. E., N. Knowles, L. R. Brown, D. Cayan, M. D. Dettinger, T. L. Morgan, D. H. Schoellhamer, M. T. Stacey, M. van der Wegen, R. W. Wagner, and A. D. Jassby., 2011. Projected evolution of California's San Francisco Bay-Delta-River system in a century of climate change. *PLoS One* 6. <https://doi.org/10.1371/journal.pone.0024465>
- Coffey, R., B. Benham, K. Kline, M. L. Wolfe, and E. Cummins., 2015. Modeling the impacts of climate change and future land use variation on microbial transport. *Journal of Water and Climate Change* 6:449-471. <https://doi.org/10.2166/wcc.2015.049>
- Cousino, L. K., R. H. Becker, and K. A. Zmijewski., 2015. Modeling the effects of climate change on water, sediment, and nutrient yields from the Maumee River watershed. *Journal of Hydrology: Regional Studies* 4:762-775. <https://doi.org/10.1016/j.ejrh.2015.06.017>
- Crossman, J., M. N. Futter, S. K. Oni, P. G. Whitehead, L. Jin, D. Butterfield, H. M. Baulch, and P. J. Dillon., 2013. Impacts of climate change on hydrology and water quality: Future proofing management strategies in the Lake Simcoe watershed, Canada. *Journal of Great Lakes Research* 39:19-32. <https://doi.org/10.1016/j.jglr.2012.11.003>
- Delpla, I., and M. J. Rodriguez., 2014. Effects of future climate and land use scenarios on riverine source water quality. *Science of the Total Environment* 493:1014-1024. <https://doi.org/10.1016/j.scitotenv.2014.06.087>
- Ficklin, D. L., Y. Luo, E. Luedeling, S. Gatzke, and M. Zhang., 2010. Sensitivity of agricultural runoff loads to rising levels of CO<sub>2</sub> and climate change in the San Joaquin Valley watershed of California. *Environmental Pollution* 158:223-234. <https://doi.org/10.1016/j.envpol.2009.07.016>

- Ficklin, D. L., Y. Z. Luo, and M. H. Zhang., 2013. Climate change sensitivity assessment of streamflow and agricultural pollutant transport in California's Central Valley using Latin hypercube sampling. *Hydrological Processes* 27:2666-2675. <https://doi.org/10.1002/hyp.9386>
- Fox, K. R., and D. A. Lytle. 1996. Milwaukee's crypto outbreak: Investigation and recommendations. *Journal American Water Works Association* 88:87-94. <https://doi.org/10.1002/j.1551-8833.1996.tb06615.x>
- Hall, K.R., M.E. Herbert, S.P. Sowa, S. Mysorekar, S.A. Woznicki, P.A. Nejadhashemi and L. Wang., 2017. Reducing current and future risks: using climate change scenarios to test an agricultural conservation framework. *Journal of Great Lakes Research*, 43(1), pp.59-68. <https://doi.org/10.1016/j.jglr.2016.11.005>
- Hejkal, T. W., B. Keswick, R. L. Labelle, C. P. Gerba, Y. Sanchez, G. Dreesman, B. Hafkin, and J. L. Melnick. 1982. Viruses in a community water-supply associated with an outbreak of gastroenteritis and infectious-hepatitis. *Journal American Water Works Association* 74:318-321. <https://doi.org/10.1002/j.1551-8833.1982.tb04930.x>
- Hovenga, P. A., D. Wang, S. C. Medeiros, S. C. Hagen, and K. Alizad., 2016. The response of runoff and sediment loading in the Apalachicola River, Florida to climate and land use land cover change. *Earth's Future* 4:124-142. <https://doi.org/10.1002/2015EF000348>
- Howarth, R. W., D. P. Swaney, E. W. Boyer, R. Marino, N. Jaworski, and C. Goodale., 2006. The influence of climate on average nitrogen export from large watersheds in the Northeastern United States. *Biogeochemistry* 79:163-186. [https://doi.org/10.1007/978-1-4020-5517-1\\_8](https://doi.org/10.1007/978-1-4020-5517-1_8)
- Jayakody, P., P. B. Parajuli, and J. P. Brooks., 2015. Assessing climate variability impact on thermotolerant coliform bacteria in surface water. *Human and Ecological Risk Assessment* 21:691-706. <https://doi.org/10.1080/10807039.2014.909188>
- Jha, M. K., P. W. Gassman, and Y. Panagopoulos., 2015. Regional changes in nitrate loadings in the Upper Mississippi River Basin under predicted mid-century climate. *Regional Environmental Change* 15:449-460. <https://doi.org/10.1007/s10113-013-0539-y>
- Johnson, T., J. Butcher, D. Deb, M. Faizullahoy, P. Hummel, J. Kittle, S. McGinnis, L. O. Mearns, D. Nover, A. Parker, S. Sarkar, R. Srinivasan, P. Tuppard, M. Warren, C. Weaver, and J. Witt., 2015. Modeling streamflow and water quality sensitivity to climate change and urban development in, 20 U.S. watersheds. *Journal of the American Water Resources Association* 51:1321-1341. <https://doi.org/10.1111/1752-1688.12308>
- Gabriel M., C. Knightes, E. Cooter and R. Dennis., 2018. Modeling the combined effects of changing land cover, climate, and atmospheric deposition on nitrogen transport in the Neuse River Basin. *Journal of Hydrology: Regional Studies*, 18:68-79. <https://doi.org/10.1016/j.ejrh.2018.05.004>

- Lee, S., I.Y. Yeo, A.M. Sadeghi, G.W. McCarty, W.D. Hively, M.W. Lang and A. Sharifi., 2018. Comparative analyses of hydrological responses of two adjacent watersheds to climate variability and change using the SWAT model. *Hydrology & Earth System Sciences*, 22(1).  
<https://doi.org/10.5194/hess-22-689-2018>
- Lippy, E. C. 1981. Waterborne disease--Occurrence is on the upswing. *Journal American Water Works Association* 73:57-62.
- MacKenzie, W. R., N. J. Hoxie, M. E. Proctor, M. S. Gradus, K. A. Blair, D. E. Peterson, J. J. Kazmierczak, D. G. Addiss, K. R. Fox, J. B. Rose, and J. P. Davis. 1994. A massive outbreak in Milwaukee of cryptosporidium infection transmitted through the public water supply. *New England Journal of Medicine* 331:161-167. <https://doi.org/10.1056/NEJM199407213310304>
- Mukundan, R., D. C. Pierson, L. Wang, A. H. Matonse, N. R. Samal, M. S. Zion, and E. M. Schneiderman., 2013. Effect of projected changes in winter streamflow on stream turbidity, Esopus Creek watershed in New York, USA. *Hydrological Processes* 27:3014-3023.  
<https://doi.org/10.1002/hyp.9824>
- Mukundan, R., S. M. Pradhanang, E. M. Schneiderman, D. C. Pierson, A. Anandhi, M. S. Zion, A. H. Matonse, D. G. Lounsbury, and T. S. Steenhuis., 2013. Suspended sediment source areas and future climate impact on soil erosion and sediment yield in a New York City water supply watershed, USA. *Geomorphology* 183:110-119. <https://doi.org/10.1016/j.geomorph.2012.06.021>
- Novello, A., 2000. The Washington County Fair Outbreak Report. New York Department of Health, Albany, NY.
- Olsen, S. J., G. Miller, T. Breuer, M. Kennedy, C. Higgins, J. Walford, G. McKee, K. Fox, W. Bibb, and P. Mead., 2002. A waterborne outbreak of *Escherichia coli* O157:H7 infections and hemolytic uremic syndrome: Implications for rural water systems. *Emerging Infectious Diseases* 8:370-375.
- O'Neal, M. R., M. A. Nearing, R. C. Vining, J. Southworth, and R. A. Pfeifer., 2005. Climate change impacts on soil erosion in Midwest United States with changes in crop management. *CATENA* 61:165-184. <https://doi.org/10.1016/j.catena.2005.03.003>
- Parajuli, P. B., P. Jayakody, G. F. Sassenrath, and Y. Ouyang., 2016. Assessing the impacts of climate change and tillage practices on stream flow, crop and sediment yields from the Mississippi River Basin. *Agricultural Water Management* 168:112-124.  
<https://doi.org/10.1016/j.agwat.2016.02.005>
- Peng, M. M., L. H. Xiao, A. R. Freeman, M. J. Arrowood, A. A. Escalante, A. C. Weltman, C. S. L. Ong, W. R. MacKenzie, A. A. Lal, and C. B. Beard. 1997. Genetic polymorphism among *Cryptosporidium parvum* isolates: Evidence of two distinct human transmission cycles. *Emerging Infectious Diseases* 3:567-573.

- Pourmokhtarian, A., C. T. Driscoll, J. L. Campbell, and K. Hayhoe., 2012. Modeling potential hydrochemical responses to climate change and increasing CO<sub>2</sub> at the Hubbard Brook Experimental Forest using a dynamic biogeochemical Model (PnET-BGC). *Water Resources Research* 48. ://WOS:000306702100001
- Praskievicz, S., 2016. Impacts of projected climate changes on streamflow and sediment transport for three snowmelt-dominated rivers in the interior Pacific Northwest. *River Research and Applications* 32:4-17. <https://doi.org/10.1002/rra.2841>
- Sebestyen, S. D., E. W. Boyer, and J. B. Shanley., 2009. Responses of stream nitrate and DOC loadings to hydrological forcing and climate change in an upland forest of the northeastern United States. *Journal of Geophysical Research: Biogeosciences* 114:n/a-n/a. <https://doi.org/10.1029/2008JG000778>
- Shrestha, R. R., Y. B. Dibike, and T. D. Prowse., 2012. Modeling climate change impacts on hydrology and nutrient loading in the Upper Assiniboine catchment. *Journal of the American Water Resources Association* 48:74-89. <https://doi.org/10.1111/j.1752-1688.2011.00592.x>
- Sulaiman, I. M., L. H. Xiao, C. F. Yang, L. Escalante, A. Moore, C. B. Beard, M. J. Arrowood, and A. A. Lal. 1998. Differentiating human from animal isolates of *Cryptosporidium parvum*. *Emerging Infectious Diseases* 4:681-685.
- Swerdlow, D. L., B. A. Woodruff, R. C. Brady, P. M. Griffin, S. Tippen, H. D. Donnell, E. Geldreich, B. J. Payne, A. Meyer, J. G. Wells, K. D. Greene, M. Bright, N. H. Bean, and P. A. Blake. 1992. A waterborne outbreak in Missouri of *Escherichia coli*-O157-H7 associated with bloody diarrhea and death. *Annals of Internal Medicine* 117:812-819.
- TDOH (Texas Department of Health). 1999. Cryptosporidiosis at Brushy Creek. Austin, TX.
- Tong, S. T. Y., A. J. Liu, and J. A. Goodrich., 2007. Climate change impacts on nutrient and sediment loads in a midwestern agricultural watershed. *Journal of Environmental Informatics* 9:18-28. <https://10.3808/jei.200700084>
- Tong, S. T. Y., Y. Sun, T. Ranatunga, J. He, and Y. J. Yang., 2012. Predicting plausible impacts of sets of climate and land use change scenarios on water resources. *Applied Geography* 32:477-489. <https://doi.org/10.1016/j.apgeog.2011.06.014>
- Towler, E., B. Rajagopalan, E. Gilleland, R. S. Summers, D. Yates, and R. W. Katz., 2010. Modeling hydrologic and water quality extremes in a changing climate: A statistical approach based on extreme value theory. *Water Resources Research* 46. <https://doi.org/10.1029/2009WR008876>
- Tu, J., 2009. Combined impact of climate and land use changes on streamflow and water quality in Eastern Massachusetts, USA. *Journal of Hydrology* 379:268-283. <https://doi.org/10.1016/j.jhydrol.2009.10.009>



- USEPA (U.S. Environmental Protection Agency), 2013. *Watershed Modeling to Assess the Sensitivity of Streamflow, Nutrient and Sediment Loads to Potential Climate Change and Urban Development in, 20 U.S. Watersheds*. EPA/600/R-12/058F, U.S. Environmental Protection Agency, Office of Research and Development, National Center for Environmental Assessment, Washington, DC.
- Verma, S., R. Bhattarai, N. S. Bosch, R. C. Cooke, P. K. Kalita, and M. Markus., 2015. Climate change impacts on flow, sediment and nutrient export in a Great Lakes watershed using SWAT. *CLEAN - Soil, Air, Water* 43:1464-1474. <https://doi.org/10.1002/clen.201400724>
- Vogt, R. L., H. E. Sours, T. Barrett, R. A. Feldman, R. J. Dickinson, and L. Witherell. 1982. Campylobacter enteritis associated with contaminated water. *Annals of Internal Medicine* 96:292-296. <https://doi.org/10.7326/0003-4819-96-3-292>
- Wallace, C.W., D.C. Flanagan and B.A. Engel., 2017. Quantifying the effects of future climate conditions on runoff, sediment, and chemical losses at different watershed sizes. *Transactions of the ASABE*, 60(3), pp.915-929. <https://doi.org/10.13031/trans.12094>
- Wang, L., D.C. Flanagan, Z. Wang and K.A. Cherkauer., 2018. Climate Change Impacts on Nutrient Losses of Two Watersheds in the Great Lakes Region. *Water*, 10(4), p.442.
- Wagena, M.B. and Z.M. Easton., 2018. Agricultural conservation practices can help mitigate the impact of climate change. *Science of The Total Environment*, 635:132-143. <https://doi.org/10.1016/j.scitotenv.2018.04.110>
- Wagena, M.B., A.S. Collick, A.C. Ross, R.G. Najjar, B. Rau, A.R. Sommerlot, D.R. Fuka, P.J. Kleinman, and Z.M. Easton., 2018. Impact of climate change and climate anomalies on hydrologic and biogeochemical processes in an agricultural catchment of the Chesapeake Bay watershed, USA. *Science of The Total Environment*, 637, pp.1443-1454. <https://doi.org/10.1016/j.scitotenv.2018.05.116>
- Weniger, B. G., M. J. Blaser, J. Gedrose, E. C. Lippy, and D. D. Juranek. 1983. An outbreak of waterborne giardiasis associated with heavy-water runoff due to warm weather and volcanic ashfall. *American Journal of Public Health* 73:868-872.
- Wu, Y., S. Liu, and A. L. Gallant., 2012. Predicting impacts of increased CO<sub>2</sub> and climate change on the water cycle and water quality in the semiarid James River Basin of the Midwestern USA. *Science of the Total Environment* 430:150-160. <https://doi.org/10.1016/j.scitotenv.2012.04.058>
- Ye, L., and N. B. Grimm., 2013. Modelling potential impacts of climate change on water and nitrate export from a mid-sized, semiarid watershed in the US Southwest. *Climatic Change* 120:419-431. <https://doi.org/10.1007/s10584-013-0827-z>
